# Supplementary material for: Preparation of hydrido [CNC]-pincer cobalt complexes via selective C–H/C–F bond activation and their catalytic performances
Source: Royal Society of Chemistry journal article supplement (doi:10.1039/c8nj02979b), 2018-01-01

## Electronic Supplementary Information

### Preparation of hydrido [CNC]-pincer cobalt complexes via selective C-H/C-F bond activation and their catalytic performances

Fei Yang,<sup>a</sup> Yangyang Wang,<sup>a,b</sup> Faguan Lu,<sup>a</sup> Shangqing Xie,<sup>a</sup> Xinghao Qi,<sup>a</sup> Hongjian Sun,<sup>a</sup> Xiaoyan Li\*,<sup>a</sup>, Olaf Fuhr<sup>c</sup> and Dieter Fenske<sup>c</sup>

|                                                                                                 |     |
|-------------------------------------------------------------------------------------------------|-----|
| 1. Table S1. Crystallographic Data for Complexes <b>4</b> , <b>8</b> , and <b>11</b>            | S2  |
| 2. IR, <sup>1</sup> H NMR, <sup>31</sup> P NMR and <sup>19</sup> F NMR spectra of new complexes | S3  |
| 3. <sup>1</sup> H NMR spectra of alcohols                                                       | S27 |

## 1. Selected X-ray crystallographic data

|                               | <b>4</b>                                                         | <b>8</b>                                                         | <b>11</b>                                                        |
|-------------------------------|------------------------------------------------------------------|------------------------------------------------------------------|------------------------------------------------------------------|
| formula                       | C <sub>23</sub> H <sub>28</sub> CoF <sub>2</sub> NP <sub>2</sub> | C <sub>23</sub> H <sub>26</sub> CoF <sub>4</sub> NP <sub>2</sub> | C <sub>23</sub> H <sub>27</sub> CoF <sub>2</sub> NP <sub>2</sub> |
| <i>M<sub>z</sub></i>          | 477.33                                                           | 513.34                                                           | 603.23                                                           |
| crystal system                | Monoclinic                                                       | Monoclinic                                                       | Orthorhombic                                                     |
| space group                   | P2(1)/c                                                          | P2(1)/c                                                          | Pbca                                                             |
| a [Å]                         | 14.015(3)                                                        | 14.433(7)                                                        | 16.600(2)                                                        |
| b [Å]                         | 12.369(3)                                                        | 12.378(6)                                                        | 15.531(2)                                                        |
| c [Å]                         | 13.372(3)                                                        | 13.442(6)                                                        | 19.029(3)                                                        |
| α [°]                         | 90.00                                                            | 90.00                                                            | 90.00                                                            |
| β [°]                         | 101.86(3)                                                        | 102.169(8)                                                       | 90.00                                                            |
| γ [°]                         | 90.00                                                            | 90.00                                                            | 90.00                                                            |
| V [Å <sup>3</sup> ]           | 2268.6(8)                                                        | 2347.4(19)                                                       | 4906.0(12)                                                       |
| T [K]                         | 273(2)                                                           | 293(2)                                                           | 293(2)                                                           |
| Z                             | 4                                                                | 4                                                                | 8                                                                |
| μ[mm <sup>-1</sup> ]          | 0.923                                                            | 0.909                                                            | 2.114                                                            |
| total reflns                  | 13111                                                            | 12675                                                            | 27459                                                            |
| unique reflns                 | 5164                                                             | 4041                                                             | 5567                                                             |
| R <sub>int</sub>              | 0.0210                                                           | 0.0297                                                           | 0.0940                                                           |
| R <sub>1</sub> [I>2σ(I)]      | 0.0295                                                           | 0.0324                                                           | 0.0497                                                           |
| wR(F <sup>2</sup> )[I>2σ(I)]  | 0.0843                                                           | 0.0919                                                           | 0.1171                                                           |
| R <sub>1</sub> (all data)     | 0.0361                                                           | 0.0481                                                           | 0.0961                                                           |
| wR(F <sup>2</sup> )(all data) | 0.0946                                                           | 0.1047                                                           | 0.1345                                                           |
| GOF on F <sup>2</sup>         | 0.613                                                            | 0.994                                                            | 1.047                                                            |

## 2. IR, <sup>1</sup>H NMR, <sup>31</sup>P NMR and <sup>19</sup>F NMR spectra of new complexes

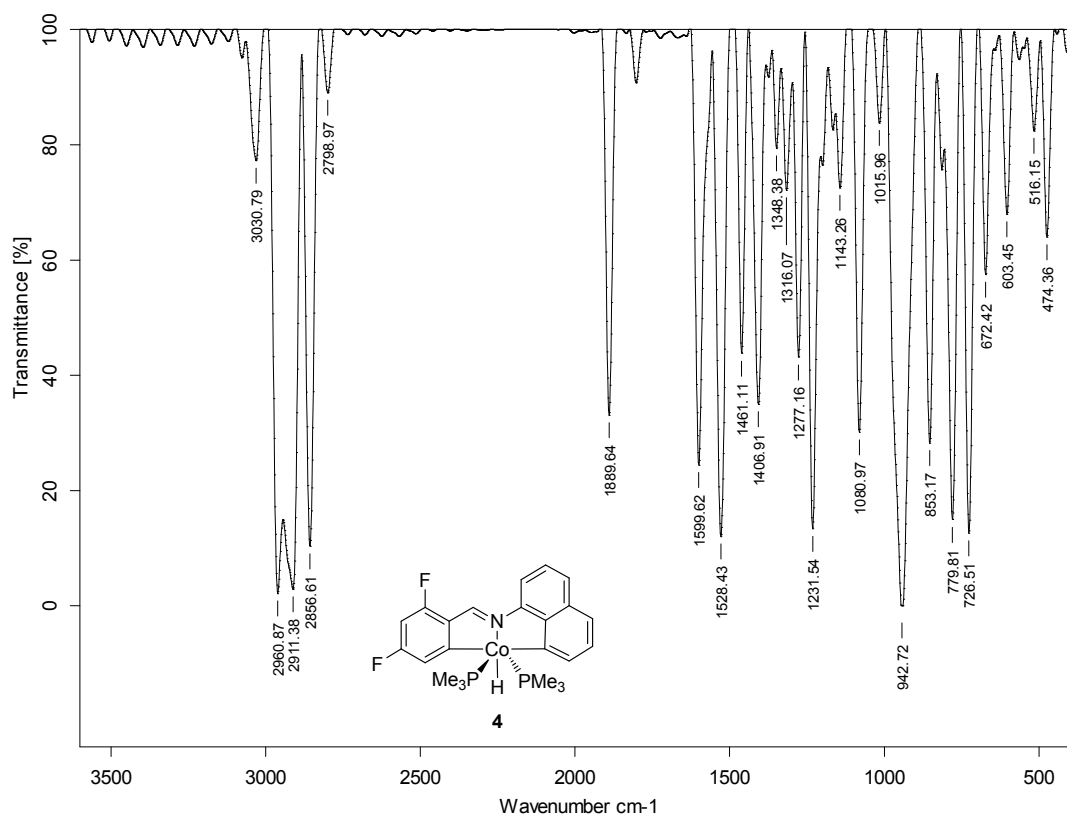

Fig S1 IR spectrum of 4

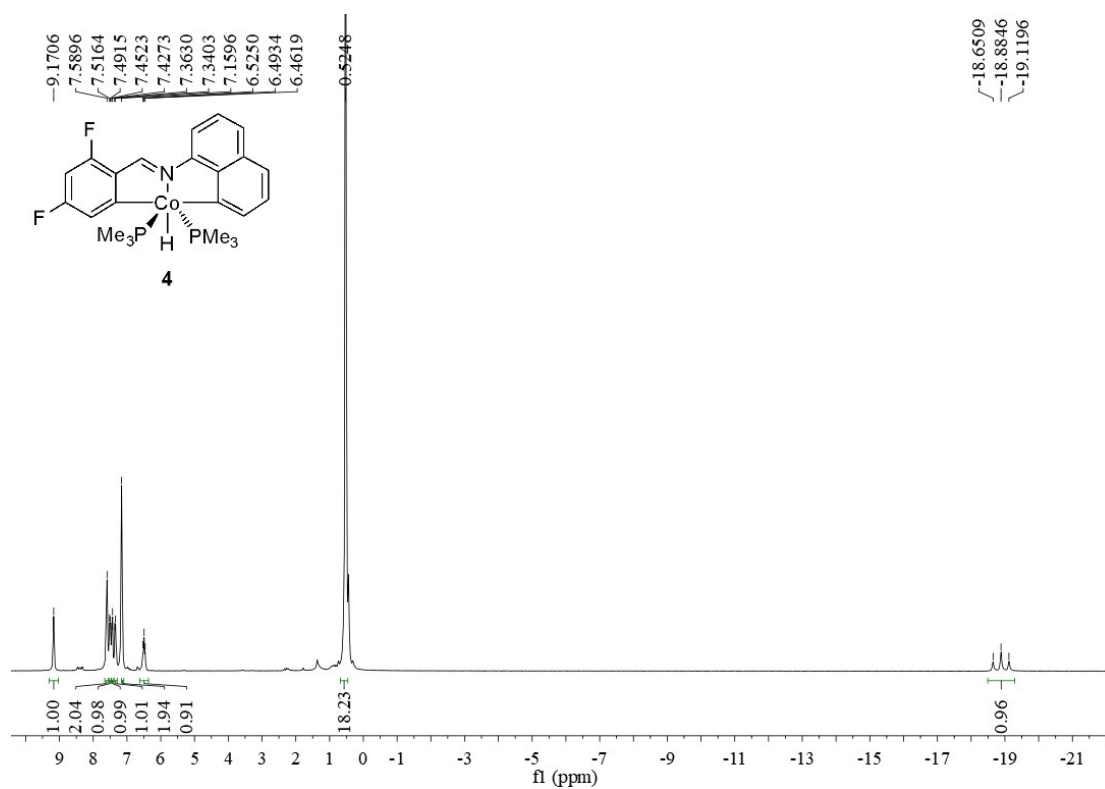

Fig S2 <sup>1</sup>H NMR spectrum of 4

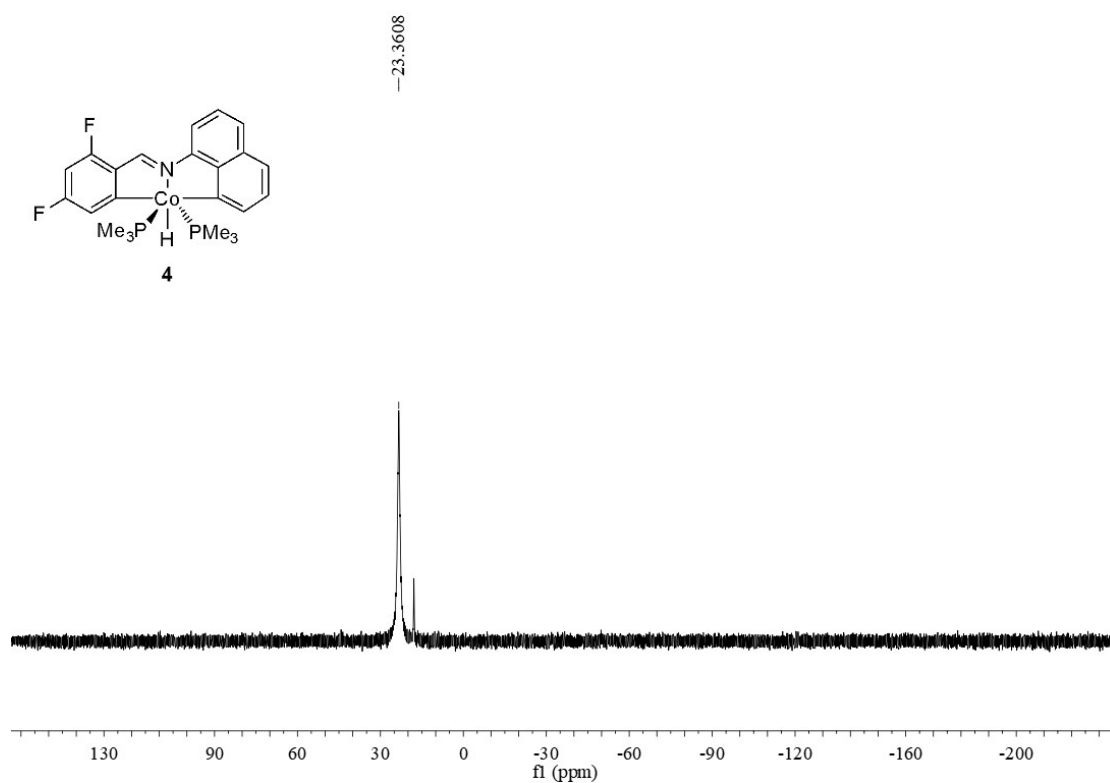

Fig S3  $^{31}\text{P}$  NMR spectrum of 4

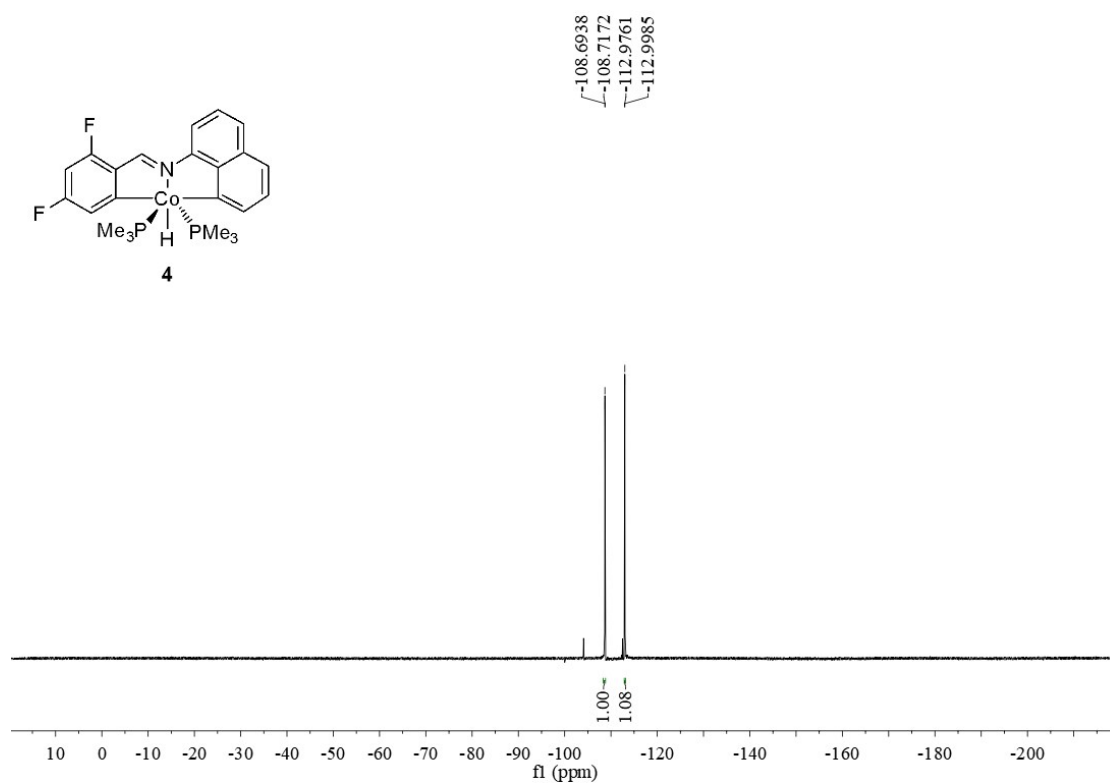

Fig S4  $^{19}\text{F}$  NMR spectrum of 4

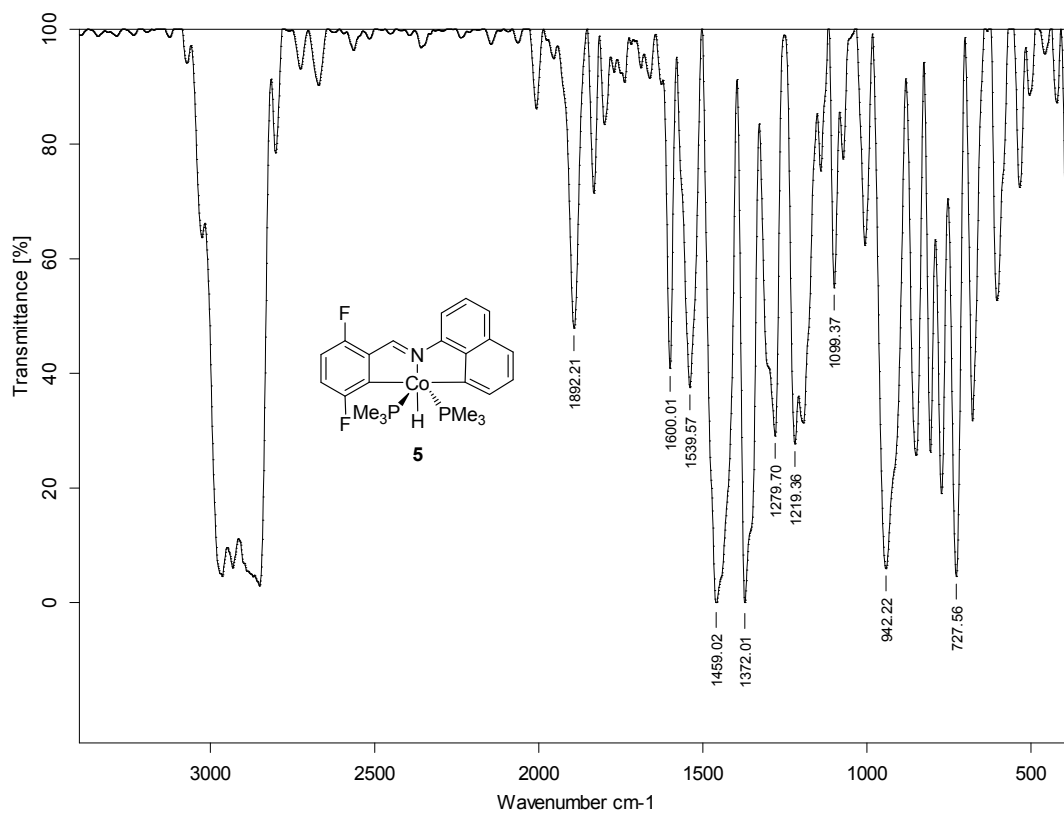

Fig S5 IR spectrum of **5**

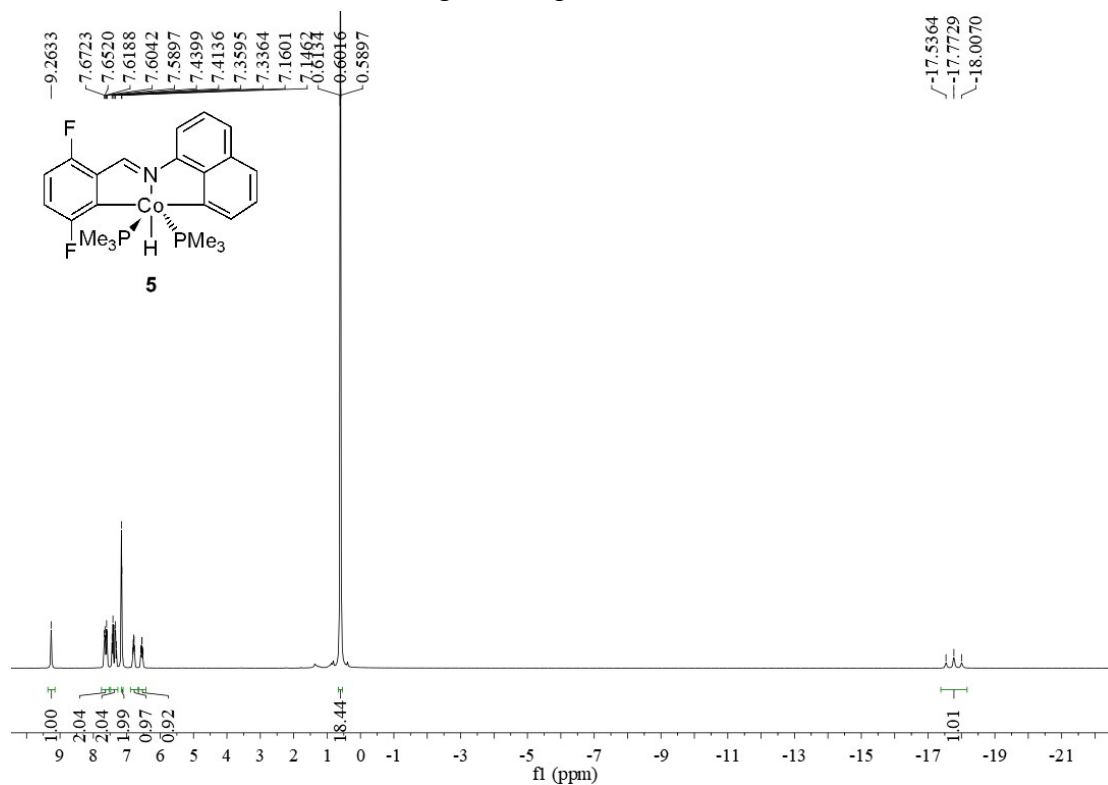

Fig S6 <sup>1</sup>H NMR spectrum of **5**

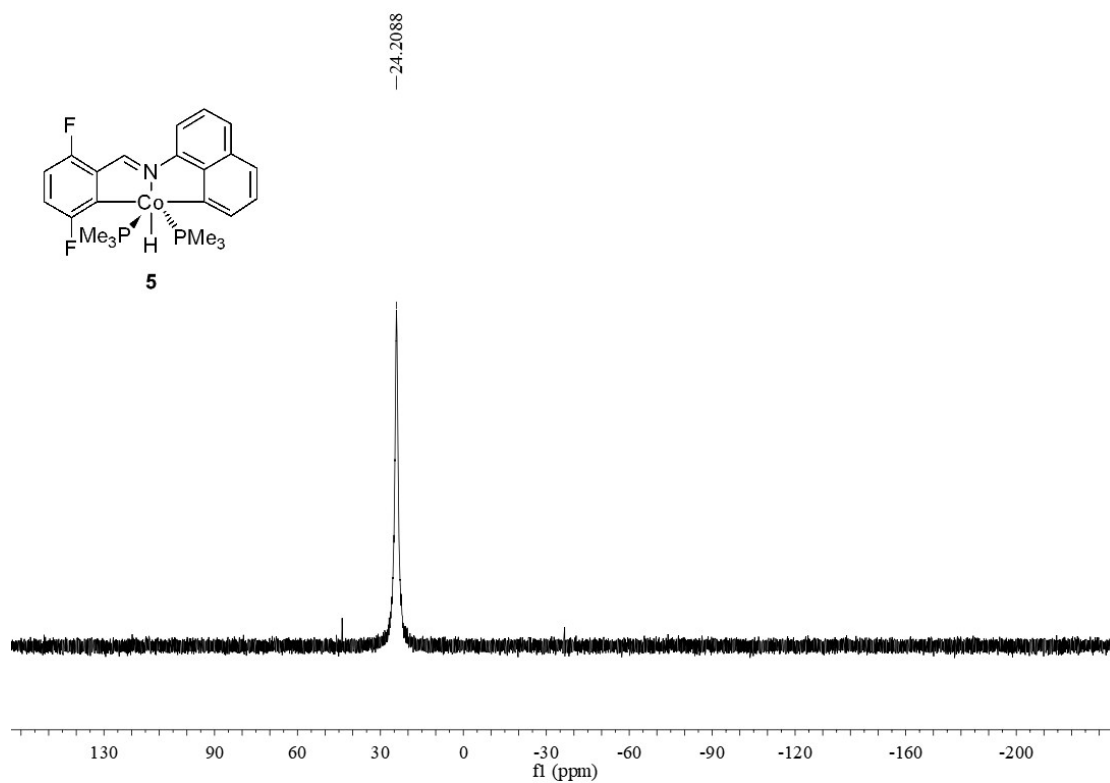

Fig S7  $^{31}\text{P}$  NMR spectrum of **5**

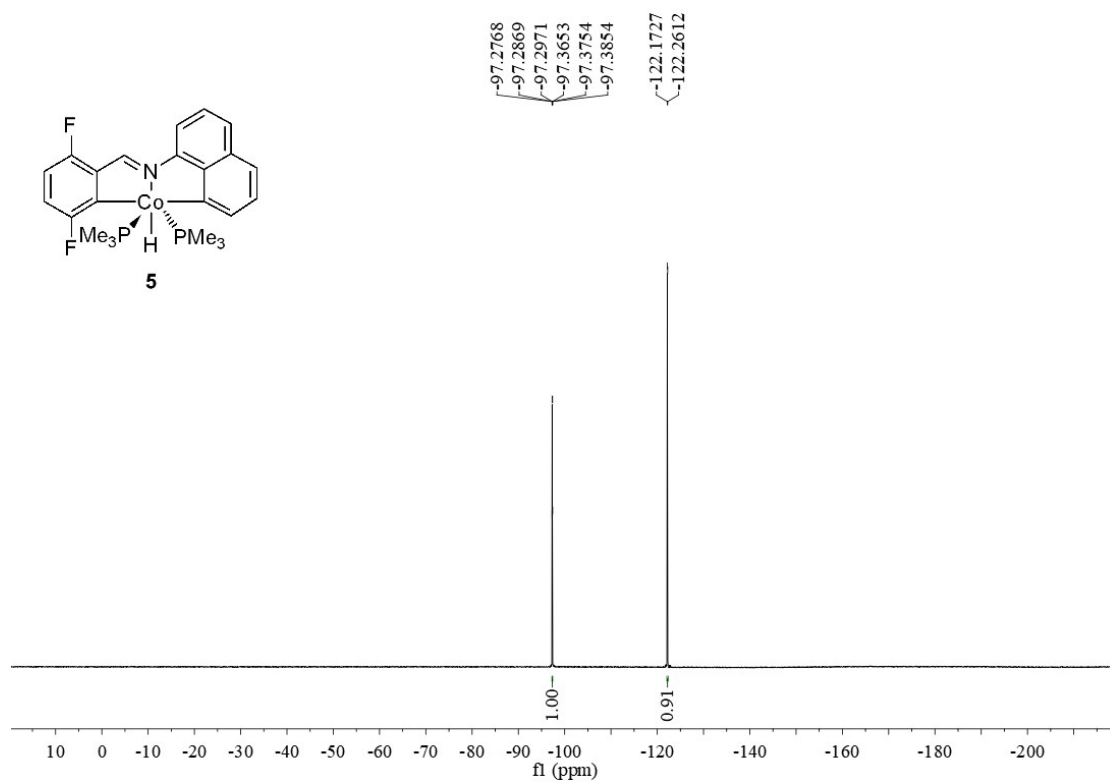

Fig S8  $^{19}\text{F}$  NMR spectrum of **5**

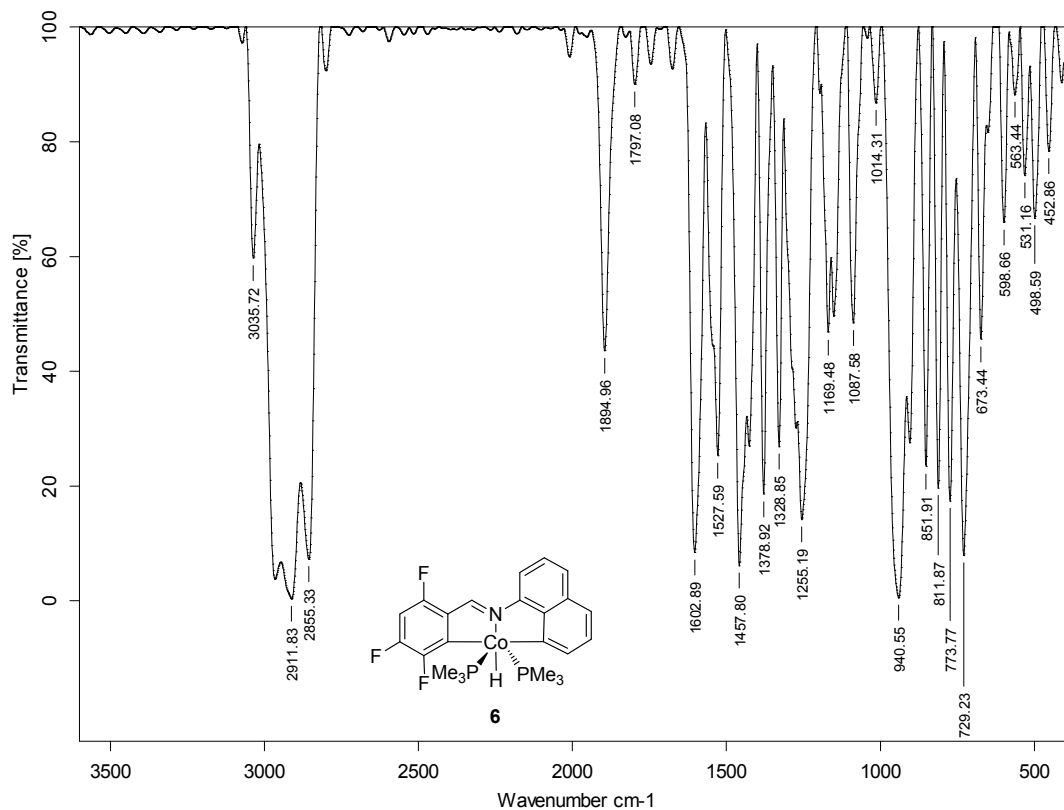

Fig S9 IR spectrum of **6**

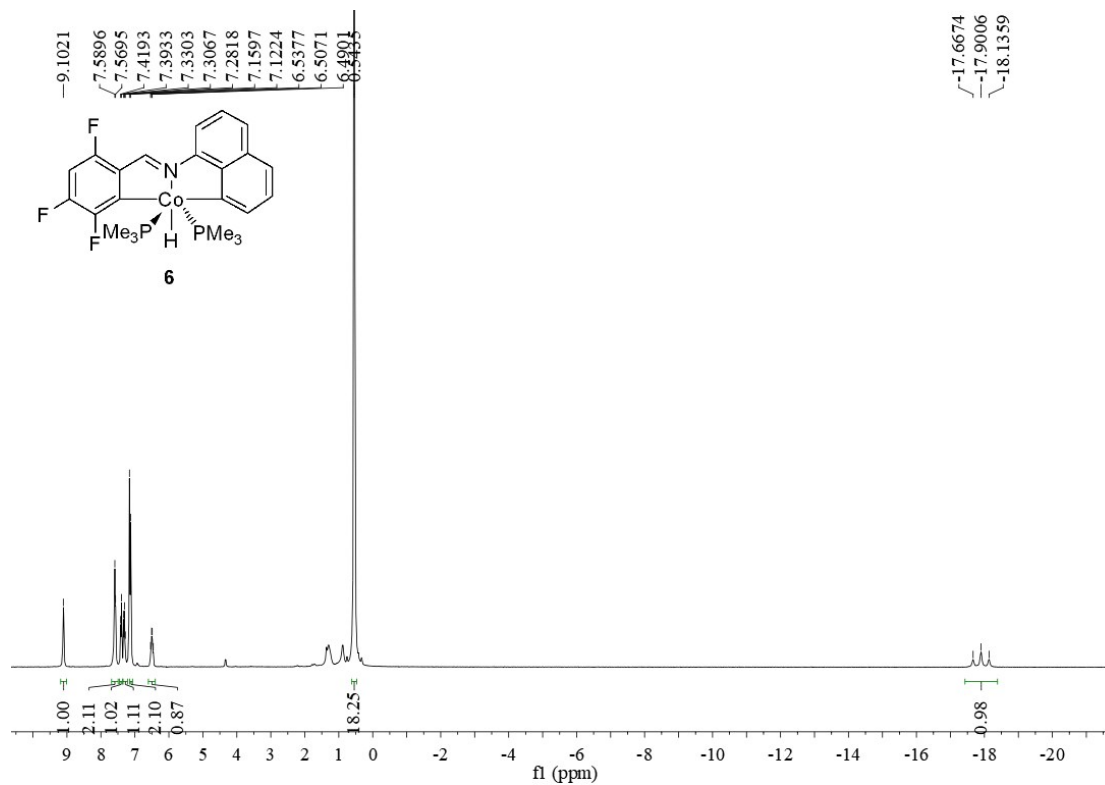

Fig S10 <sup>1</sup>H NMR spectrum of **6**

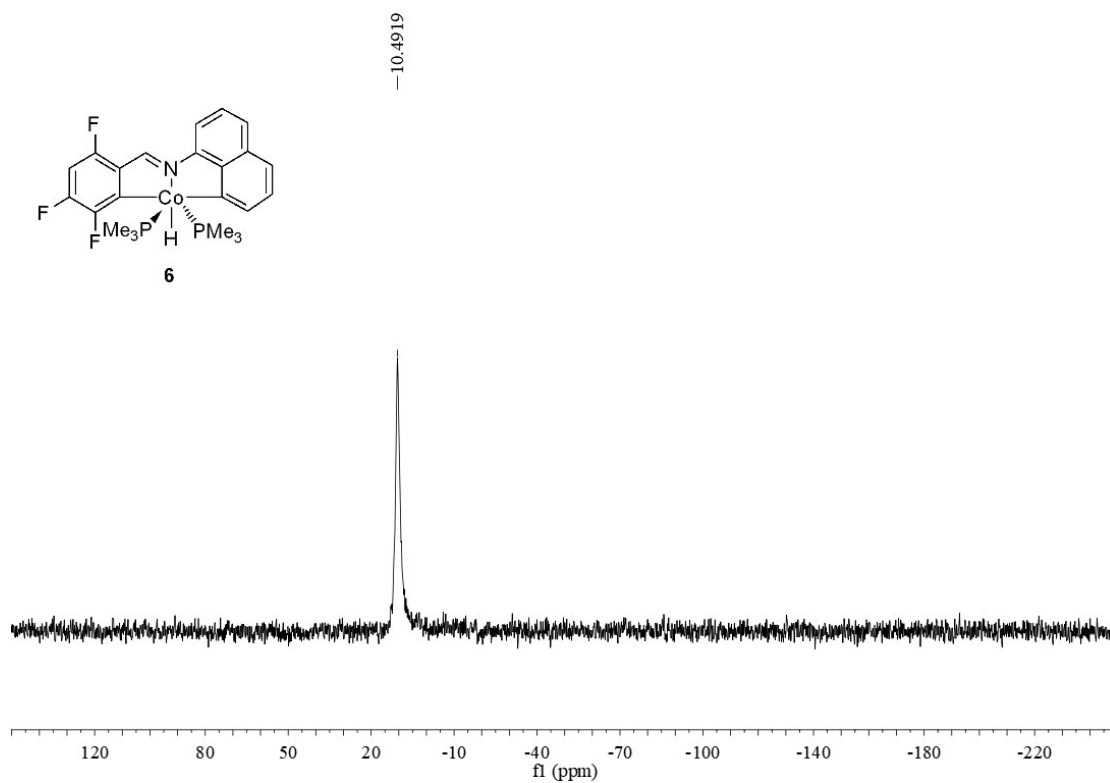

Fig S11  $^{31}\text{P}$  NMR spectrum of **6**

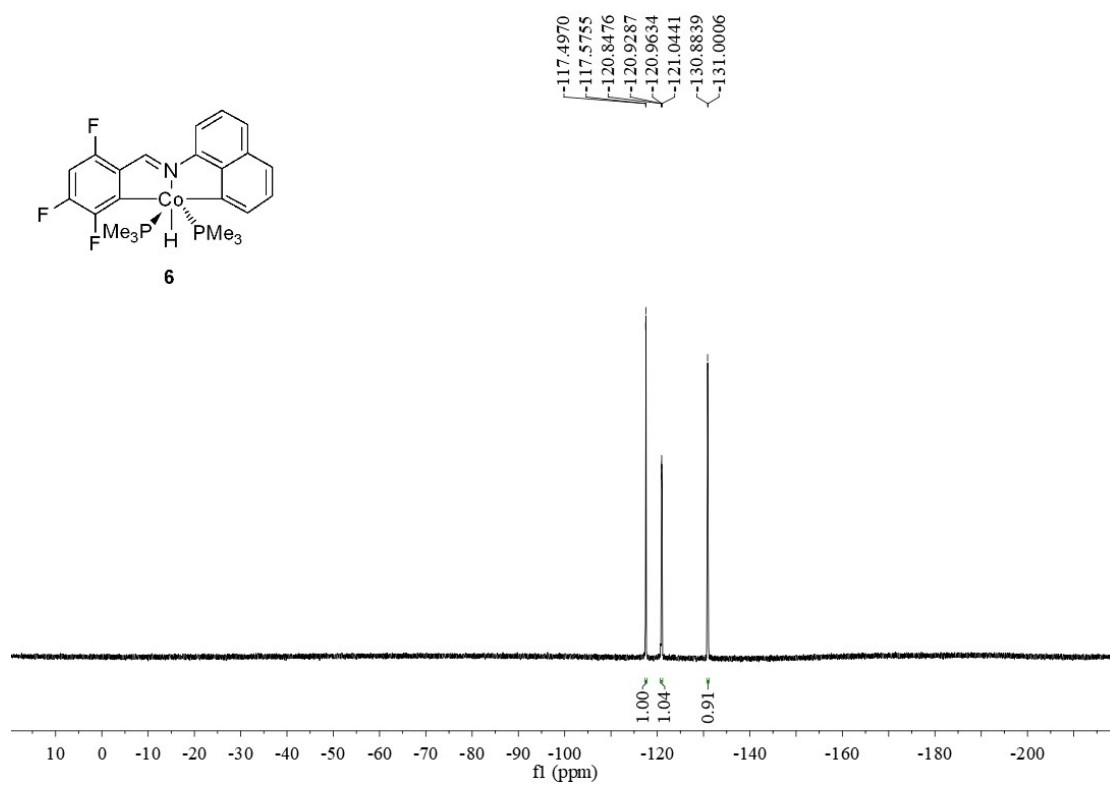

Fig S12  $^{19}\text{F}$  NMR spectrum of **6**



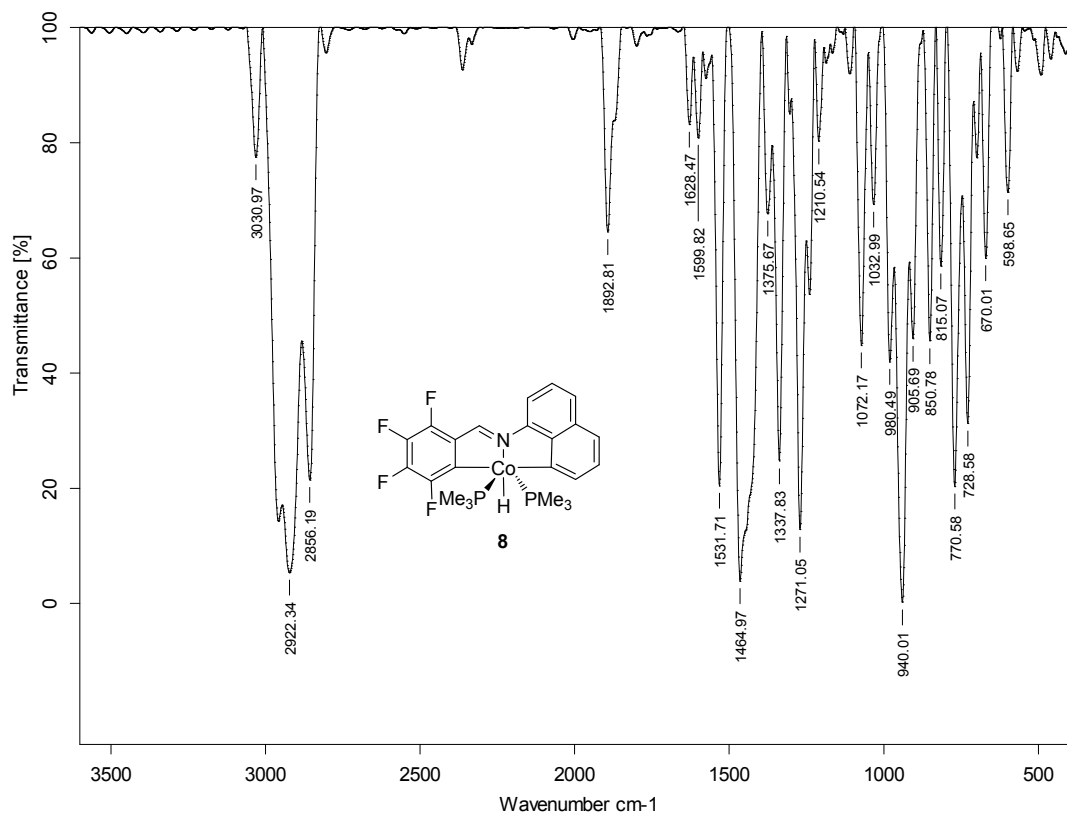

Fig S13 IR spectrum of **8**

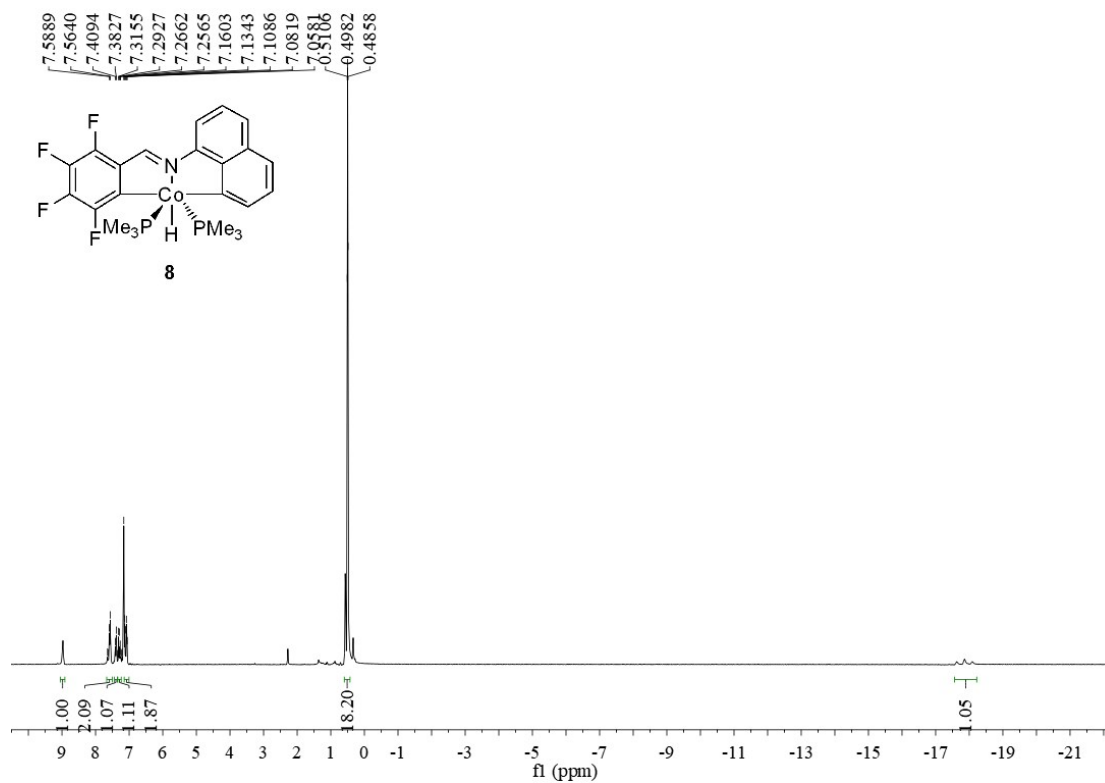

Fig S14 <sup>1</sup>H NMR spectrum of **8**

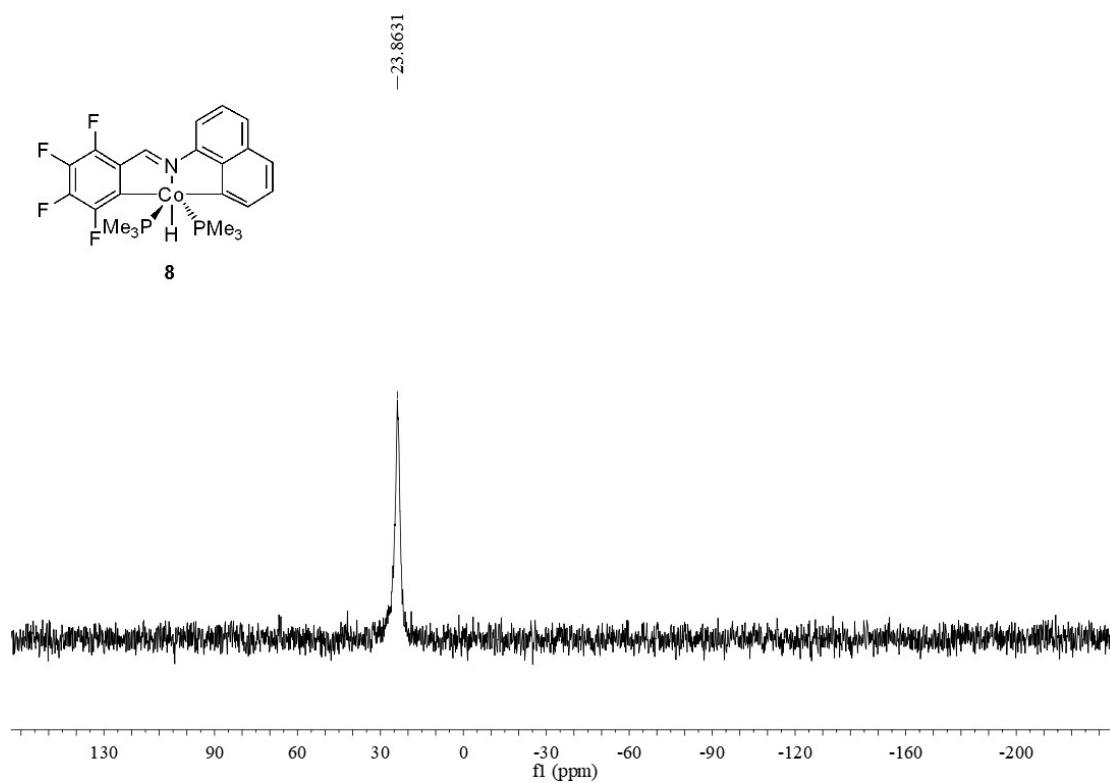

Fig S15  $^{31}\text{P}$  NMR spectrum of **8**

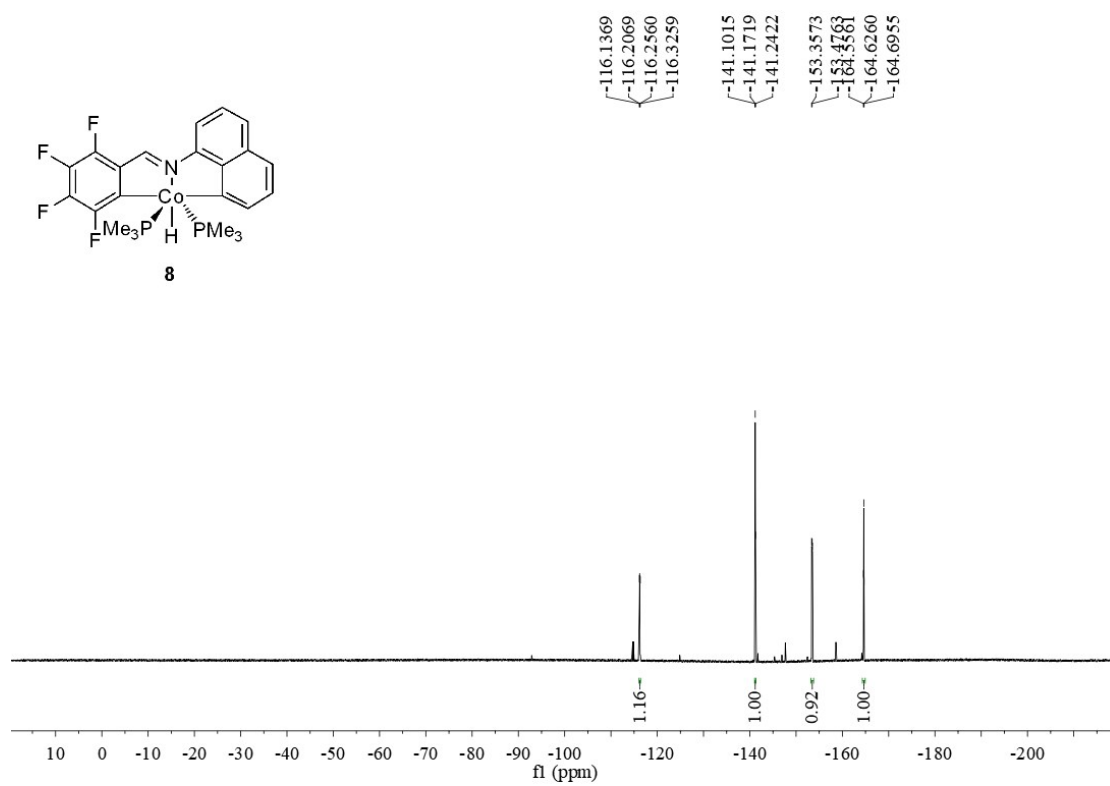

Fig S16  $^{19}\text{F}$  NMR spectrum of **8**

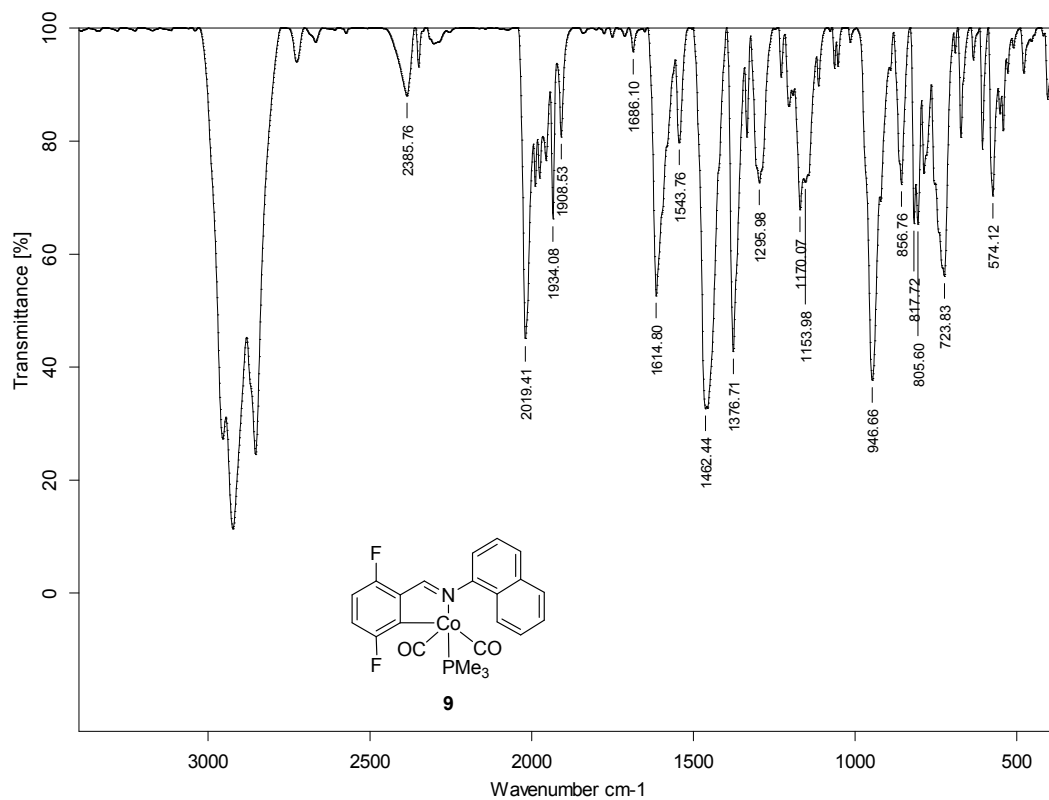

Fig S17 IR spectrum of **9**

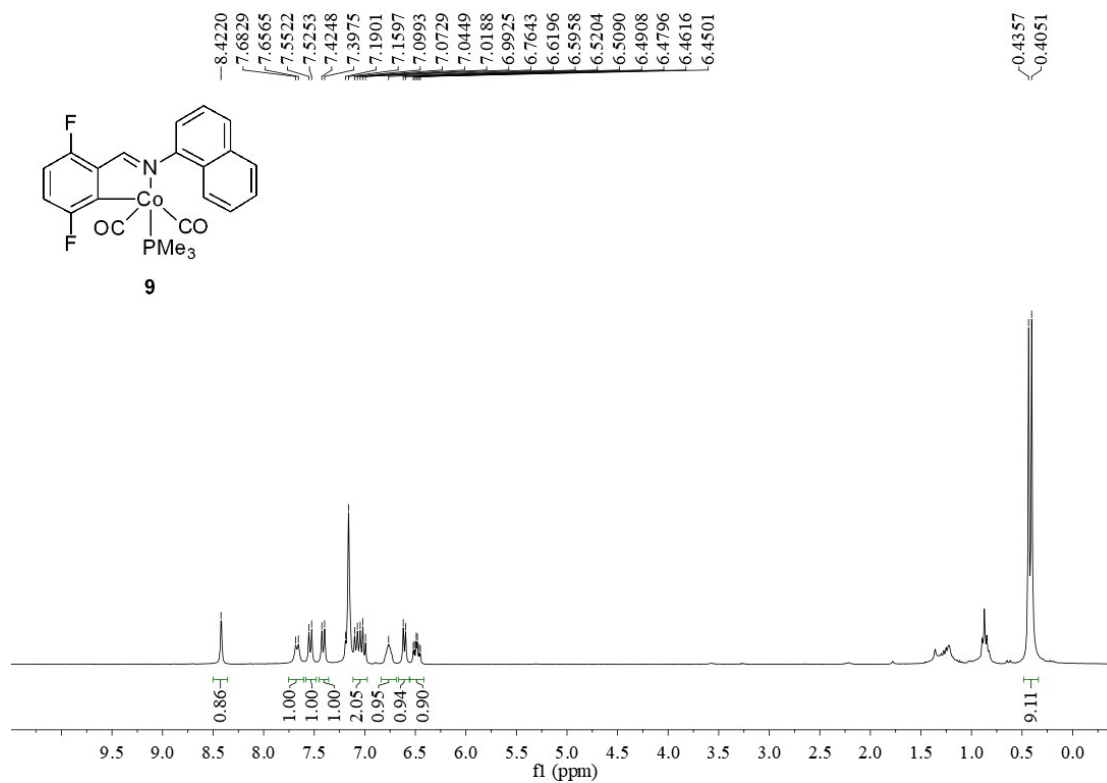

Fig S18 <sup>1</sup>H NMR spectrum of **9**

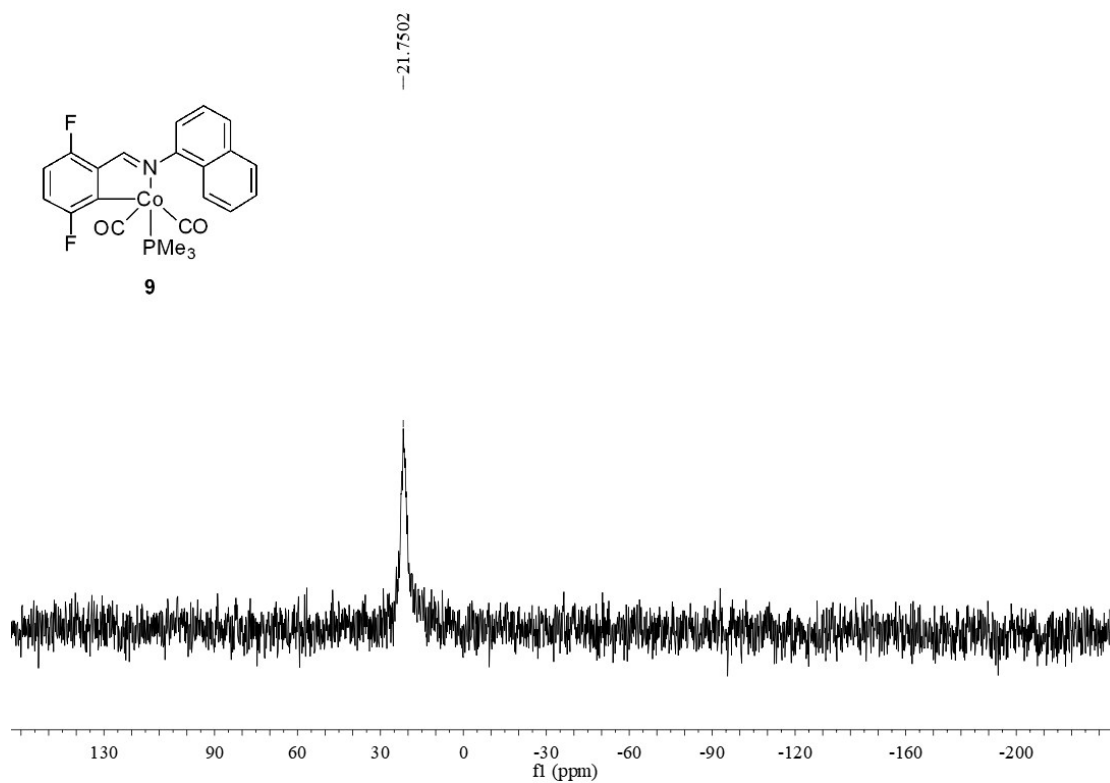

Fig S19  $^{31}\text{P}$  NMR spectrum of **9**

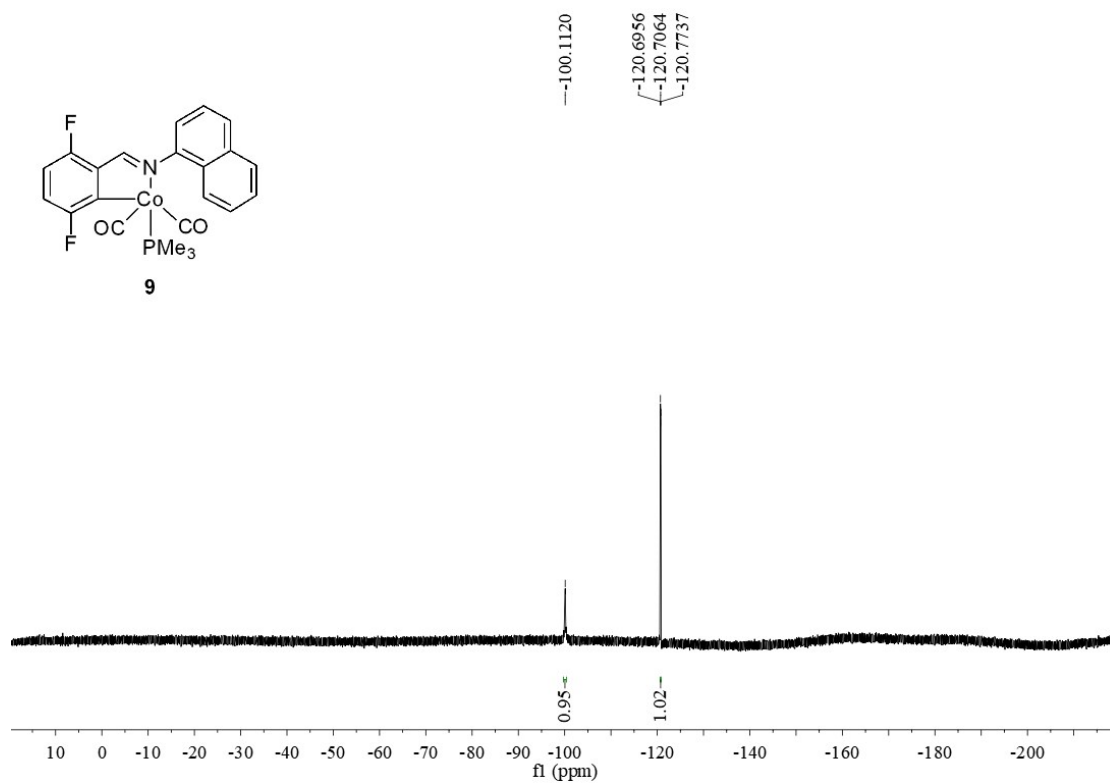

Fig S20  $^{19}\text{F}$  NMR spectrum of **9**



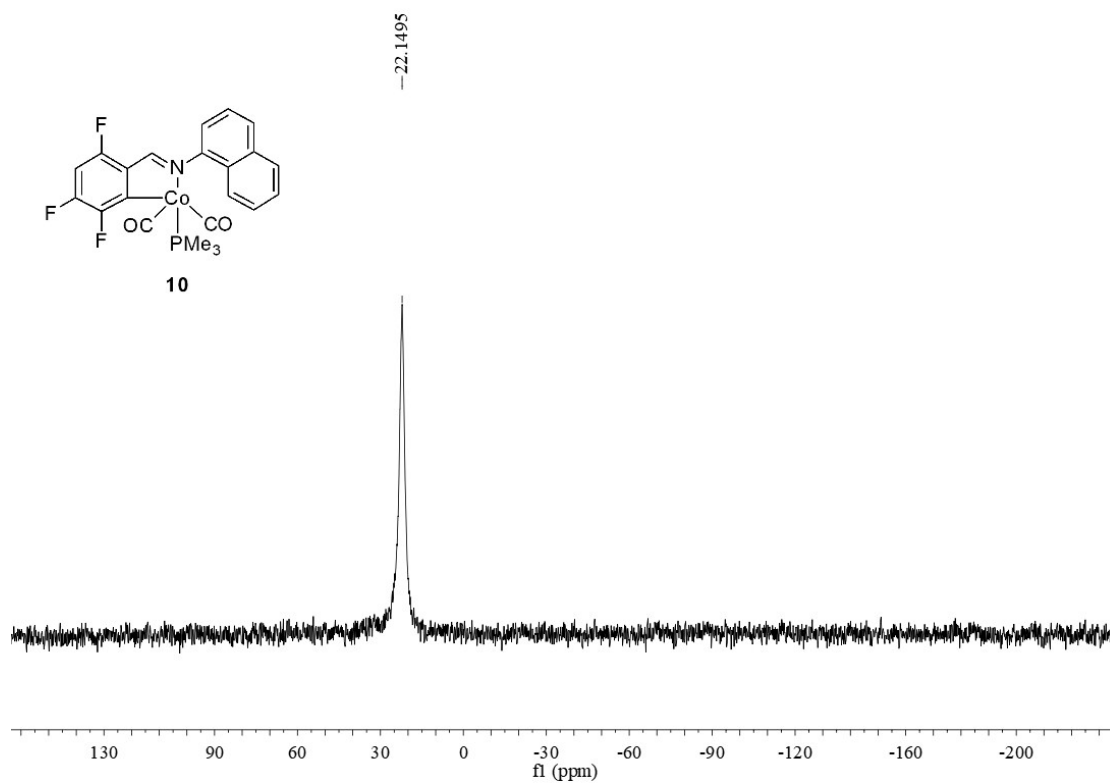

Fig S23  $^{31}\text{P}$  NMR spectrum of **10**

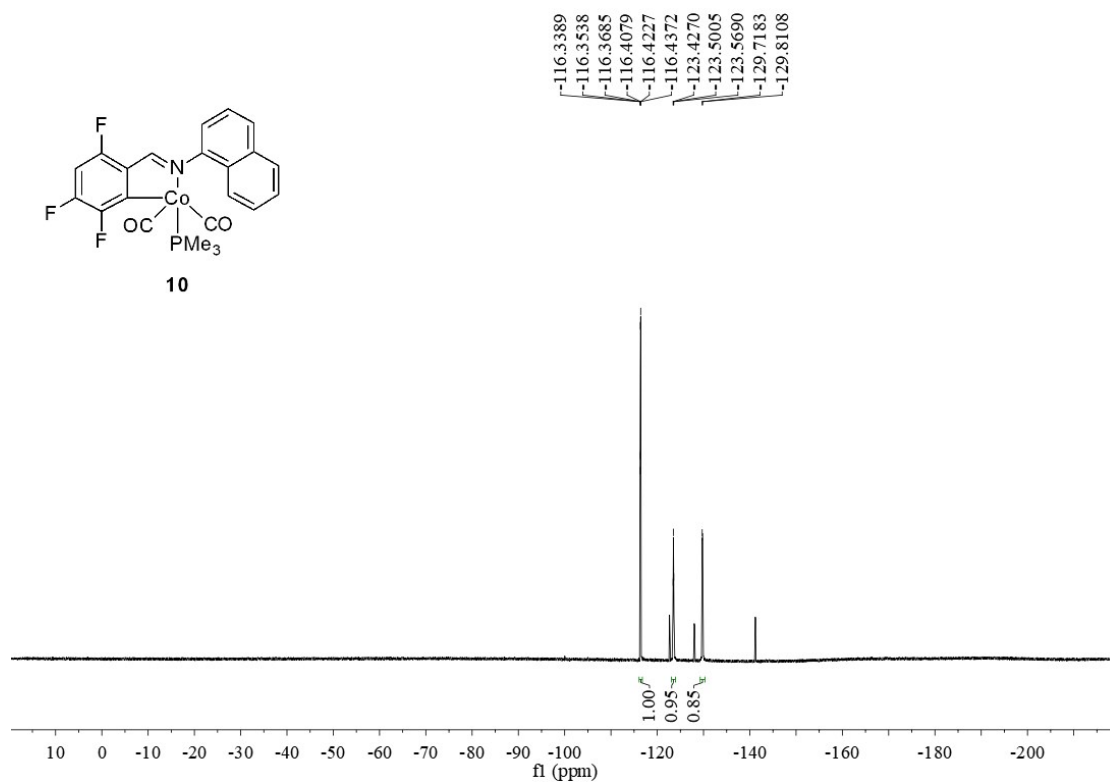

Fig S24  $^{19}\text{F}$  NMR spectrum of **10**

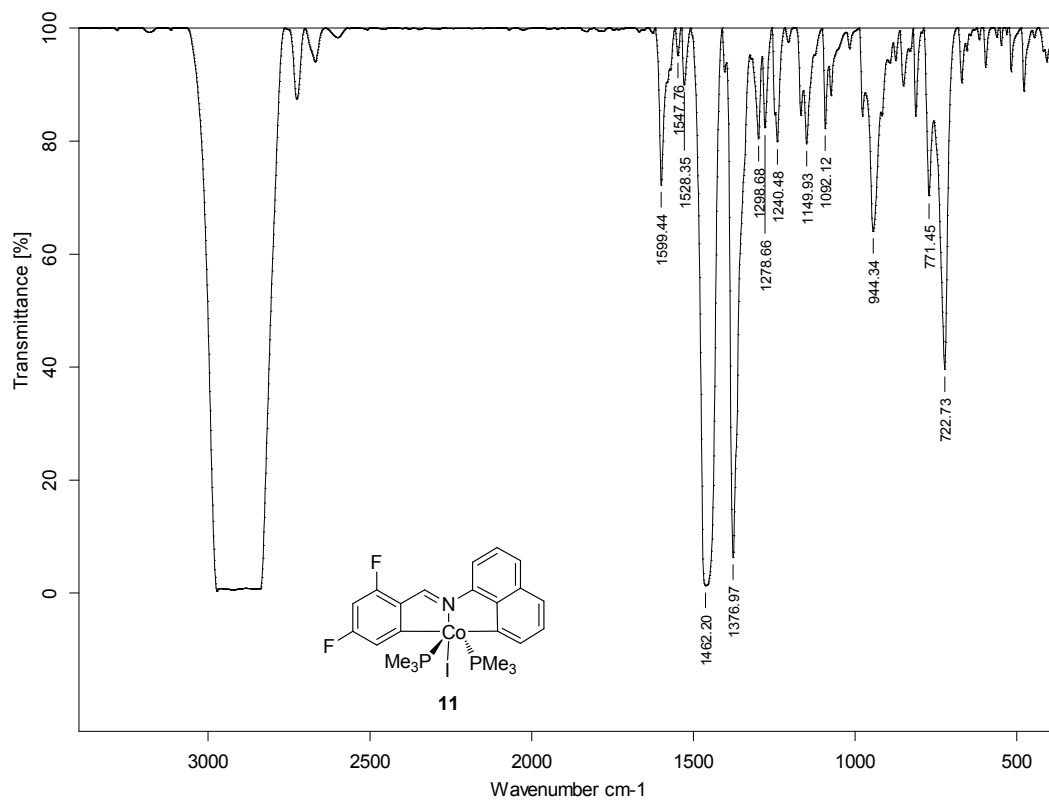

Fig S25 IR spectrum of **11**

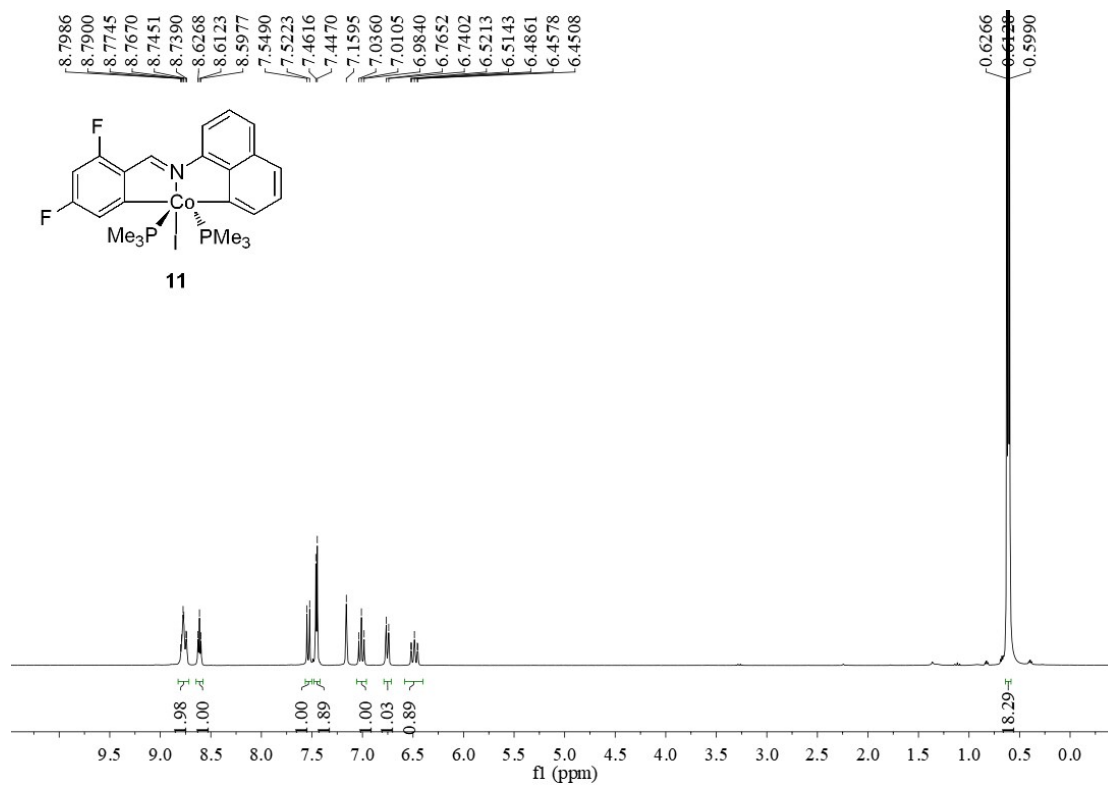

Fig S6 <sup>1</sup>H NMR spectrum of **11**

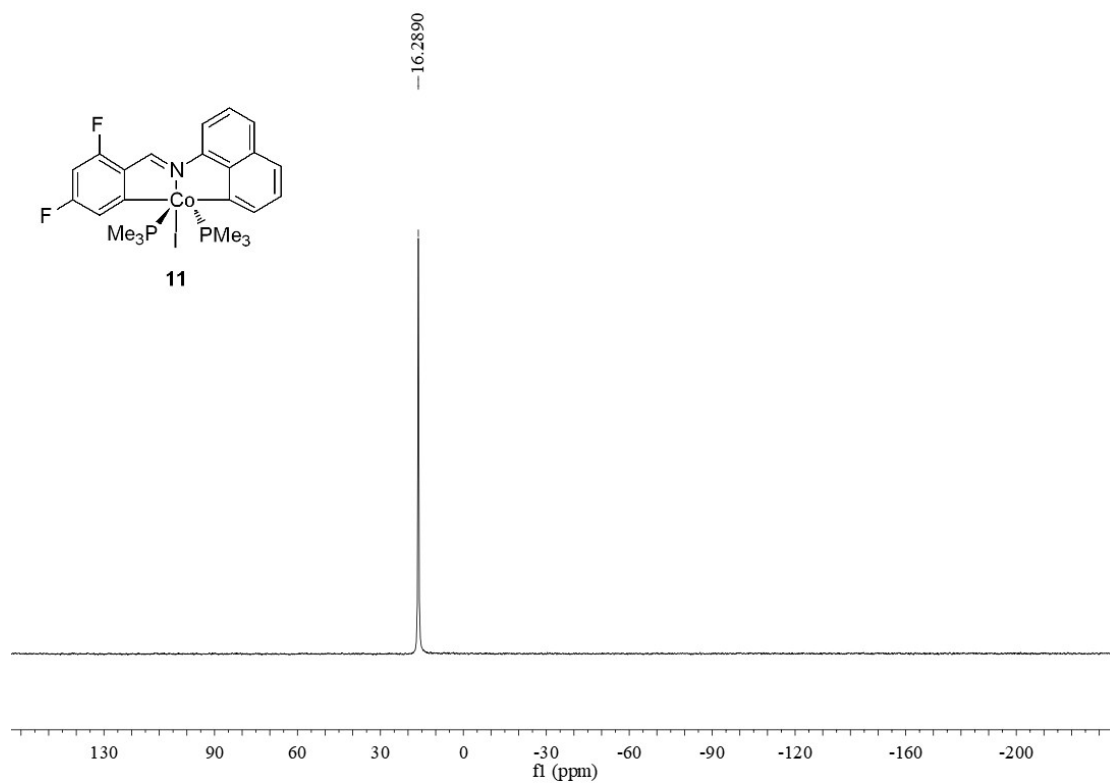

Fig S27  $^{31}\text{P}$  NMR spectrum of **11**

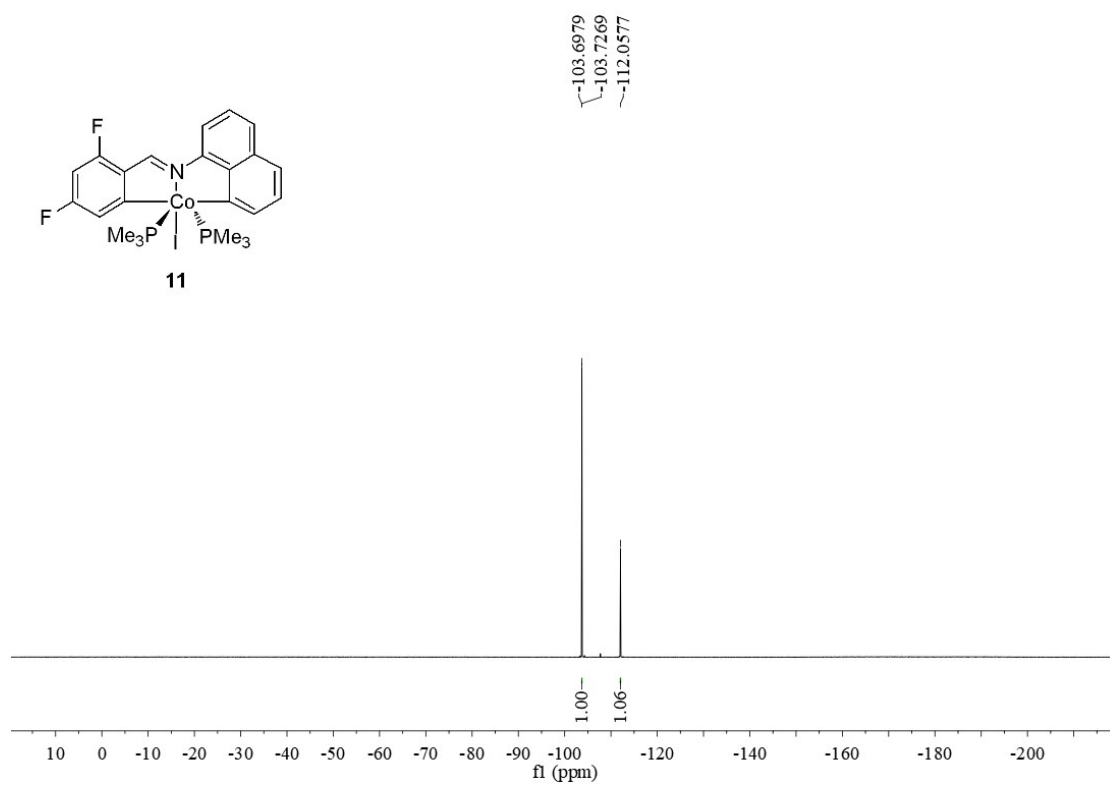

Fig S28  $^{19}\text{F}$  NMR spectrum of **11**



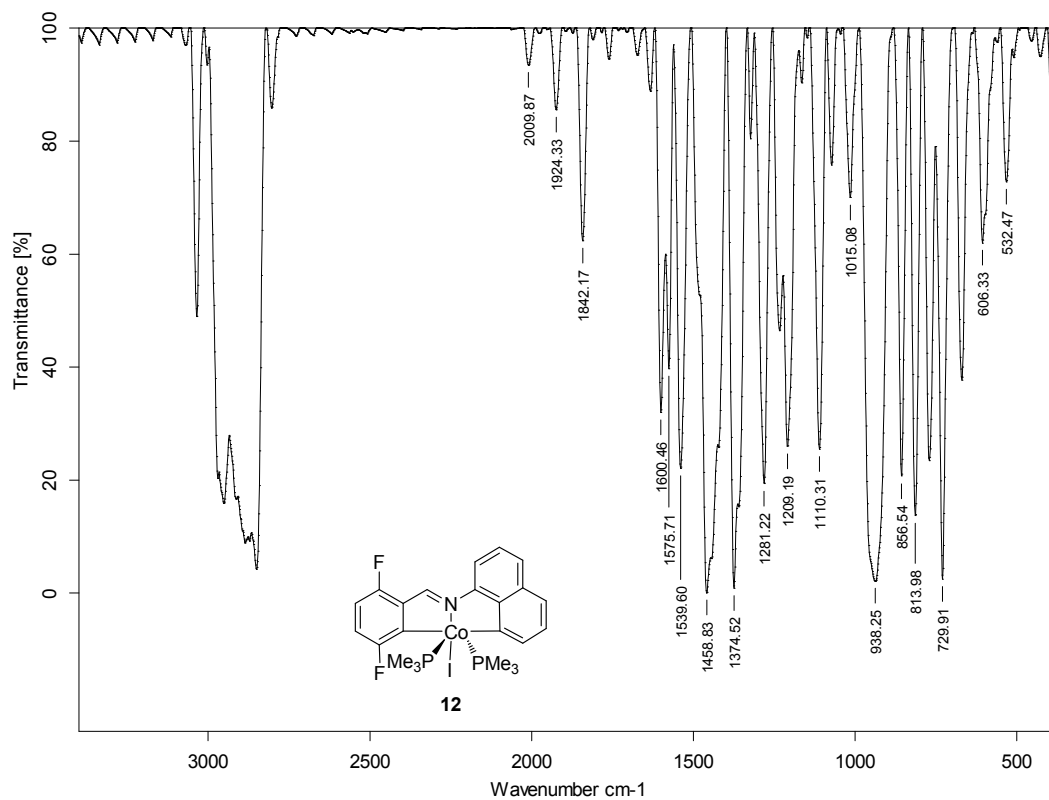

Fig S29 IR spectrum of **12**

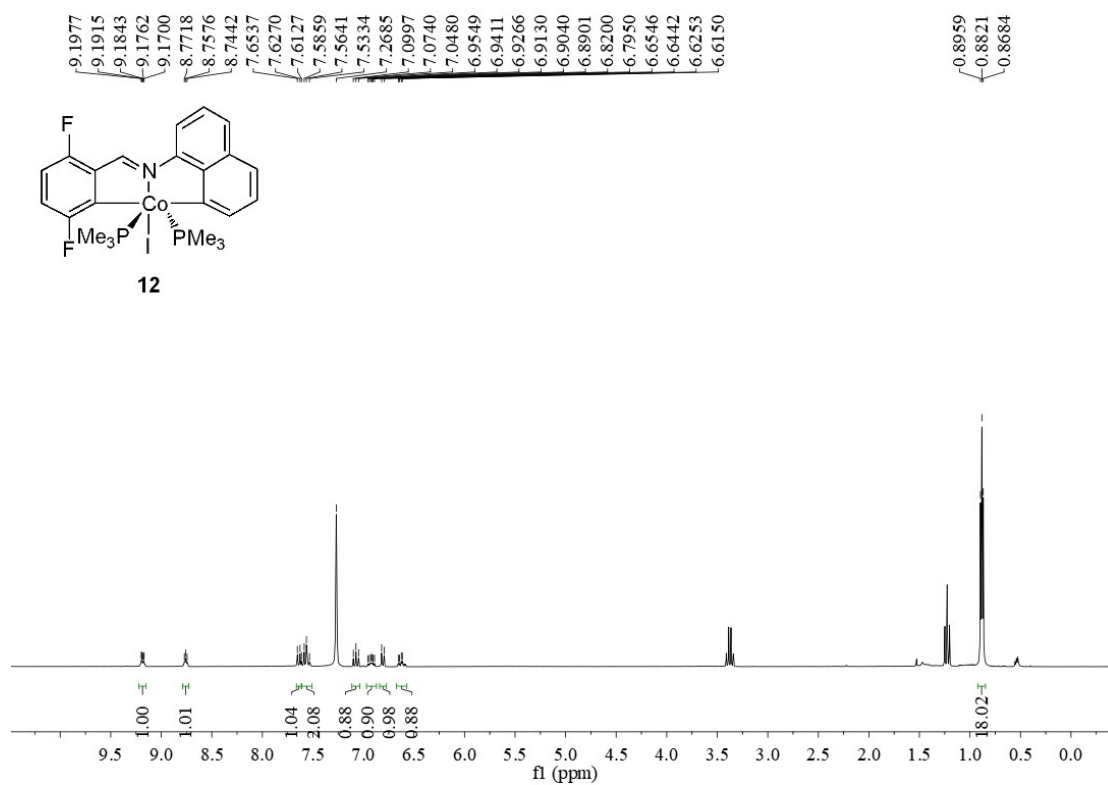

Fig S30 <sup>1</sup>H NMR spectrum of **12**

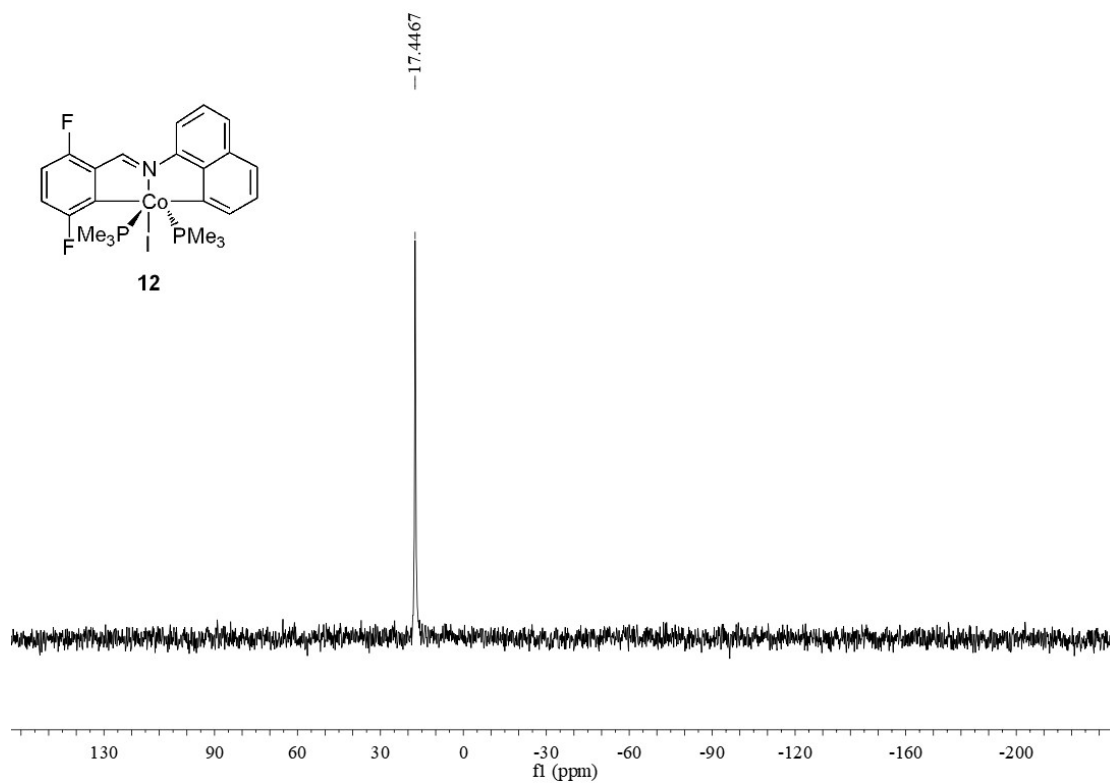

Fig S31  $^{31}\text{P}$  NMR spectrum of **12**

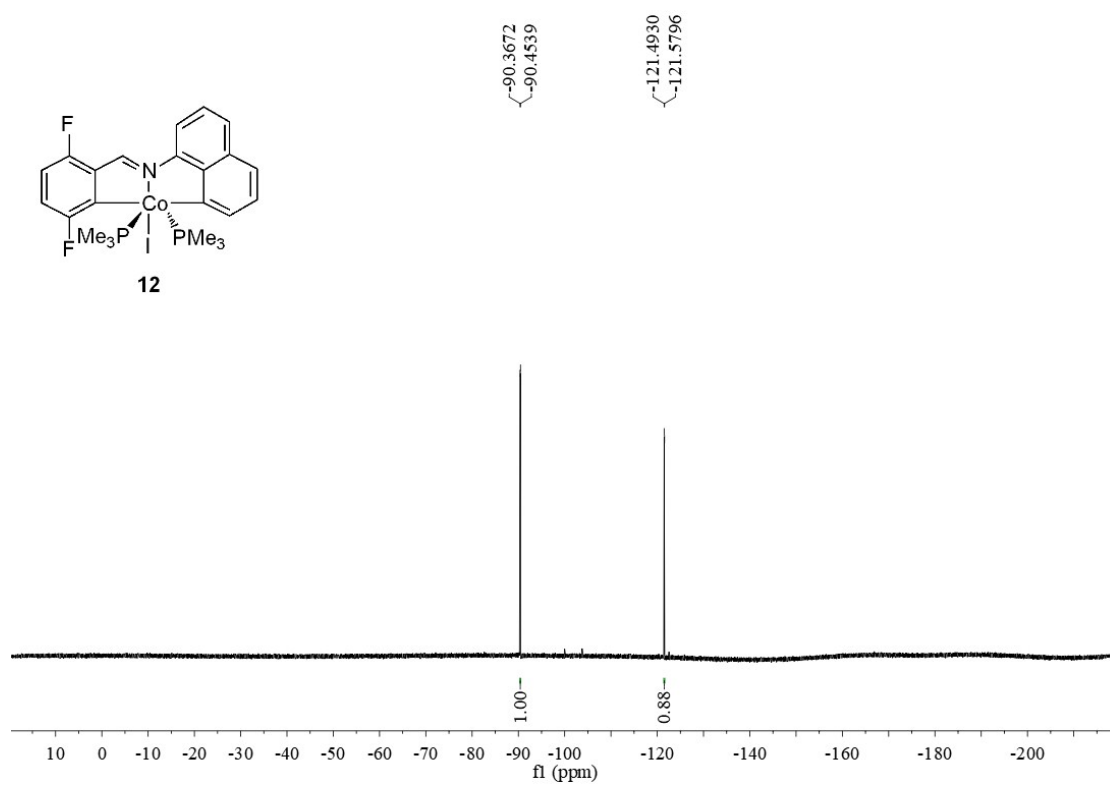

Fig S32  $^{19}\text{F}$  NMR spectrum of **12**

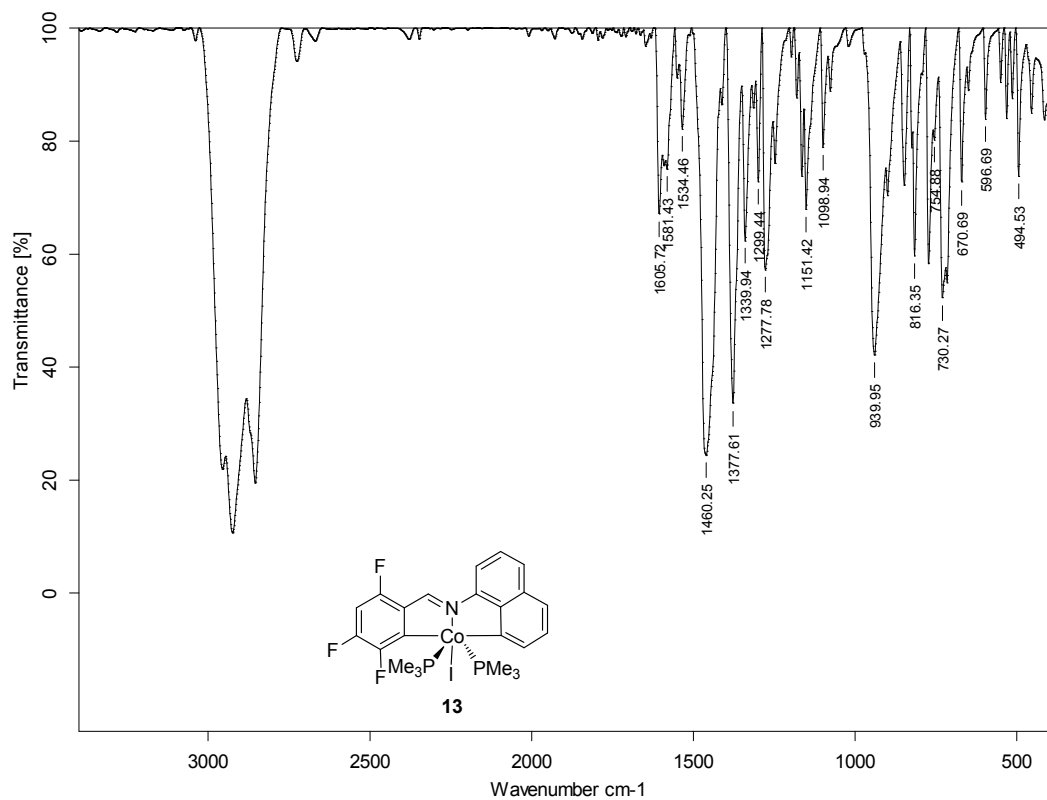

Fig S33 IR spectrum of **13**

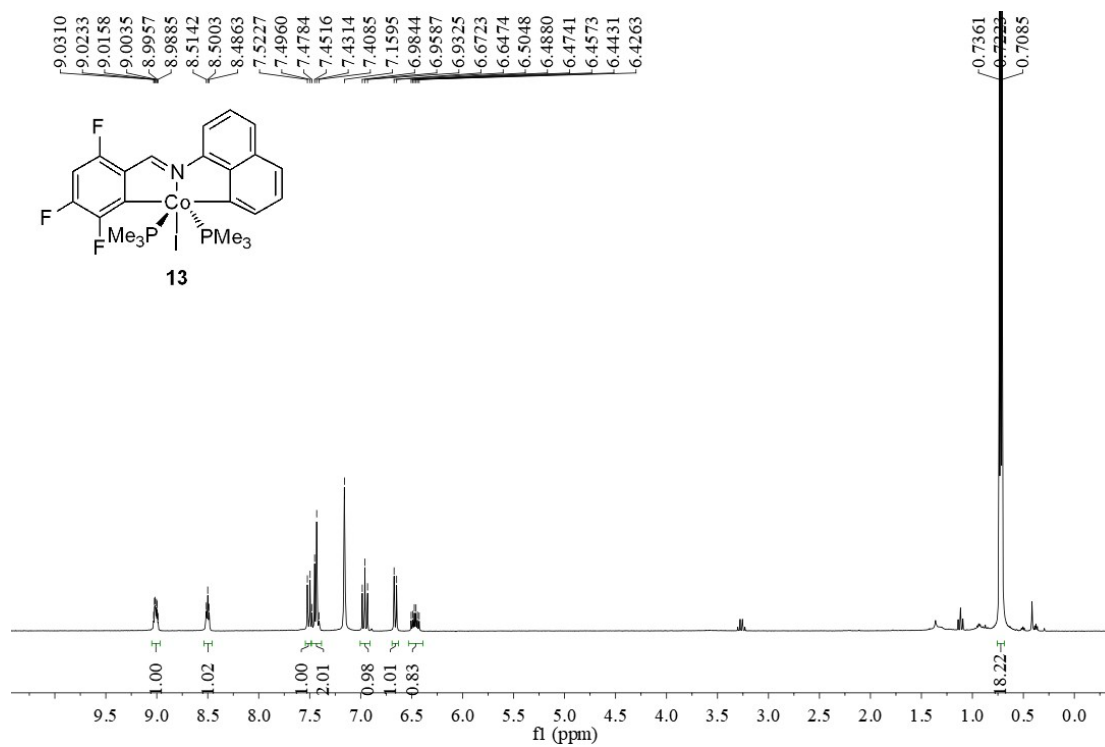

Fig S34 <sup>1</sup>H NMR spectrum of **13**

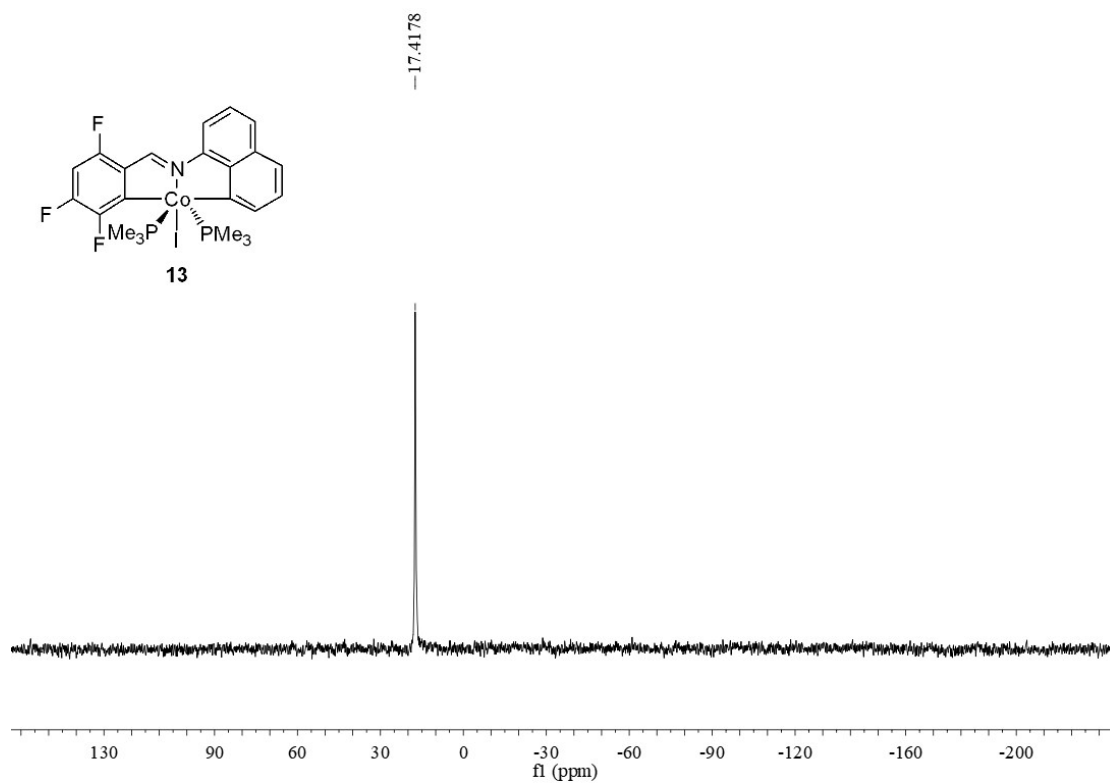

Fig S35  $^{31}\text{P}$  NMR spectrum of **13**

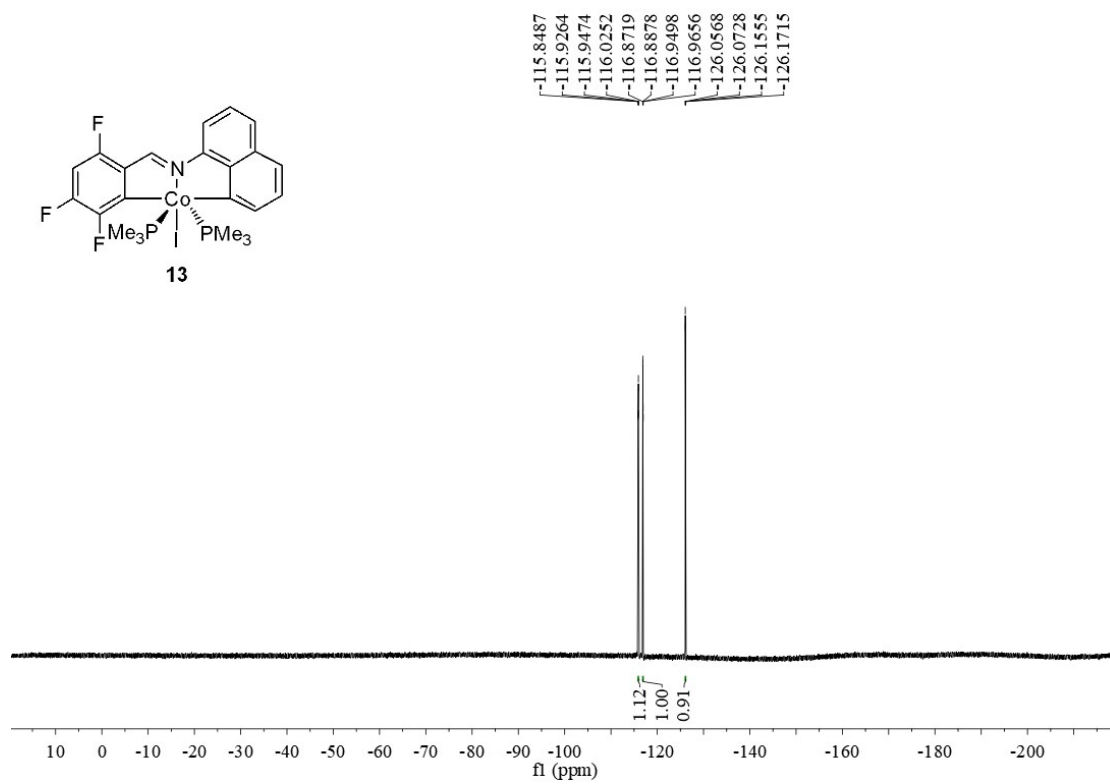

Fig S36  $^{19}\text{F}$  NMR spectrum of **13**

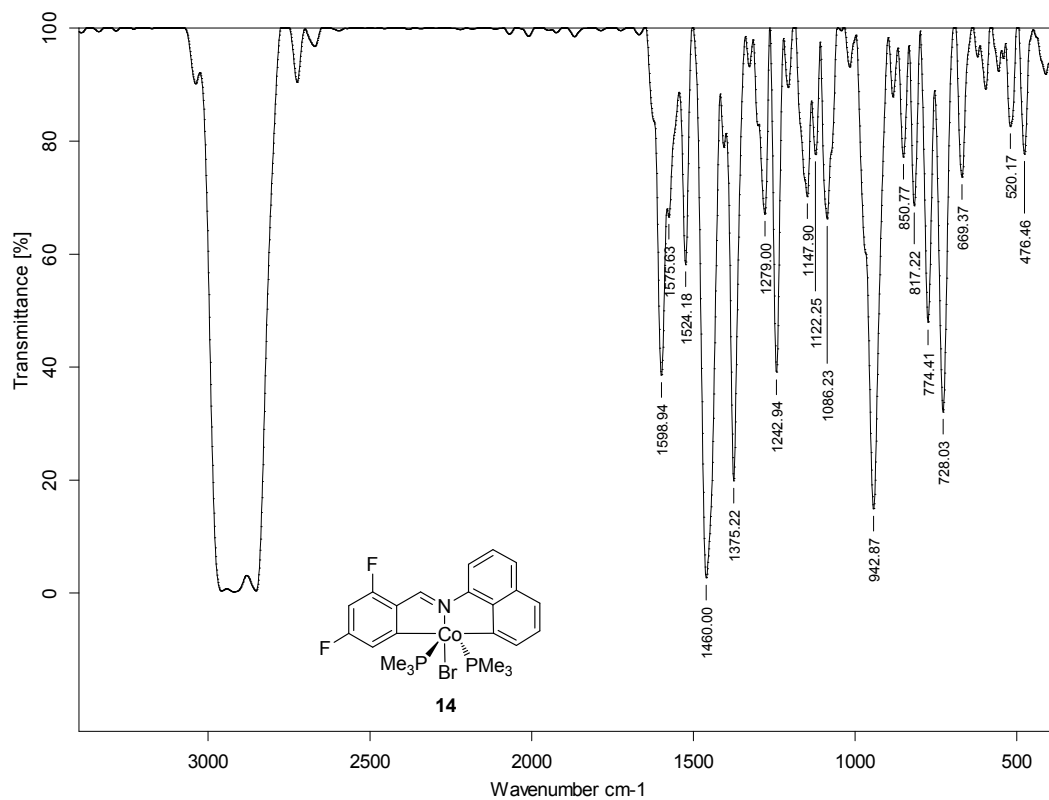

Fig S37 IR spectrum of **14**

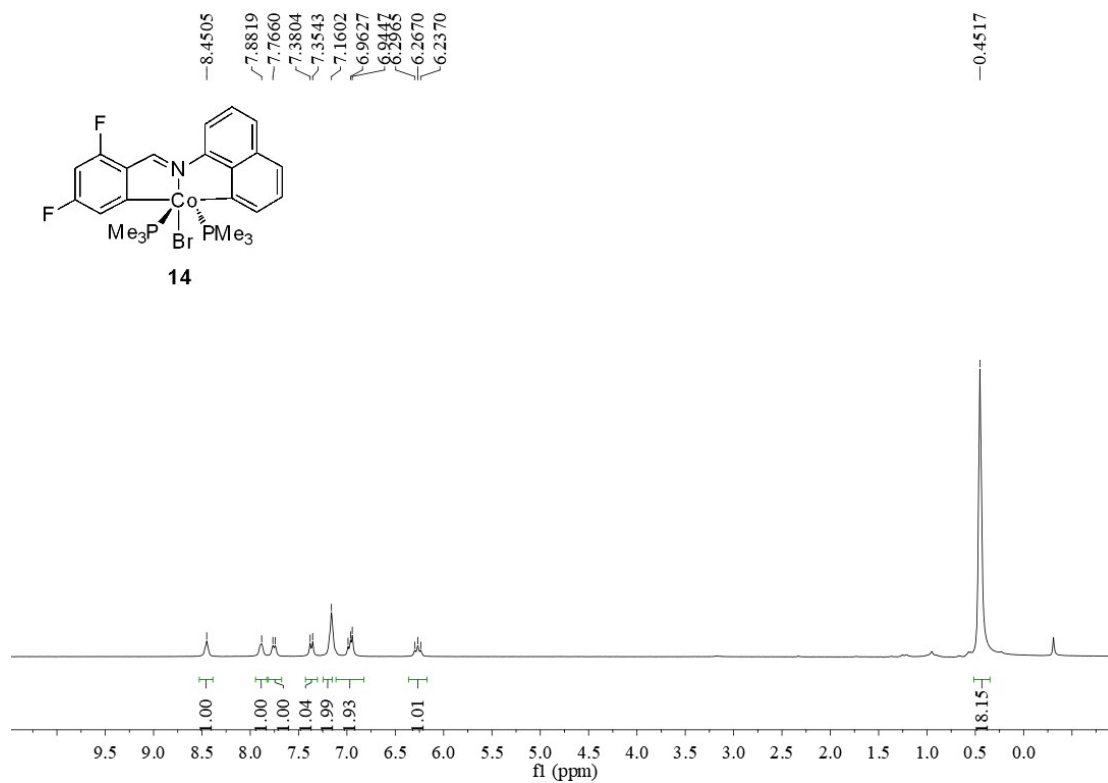

Fig S38 <sup>1</sup>H NMR spectrum of **14**

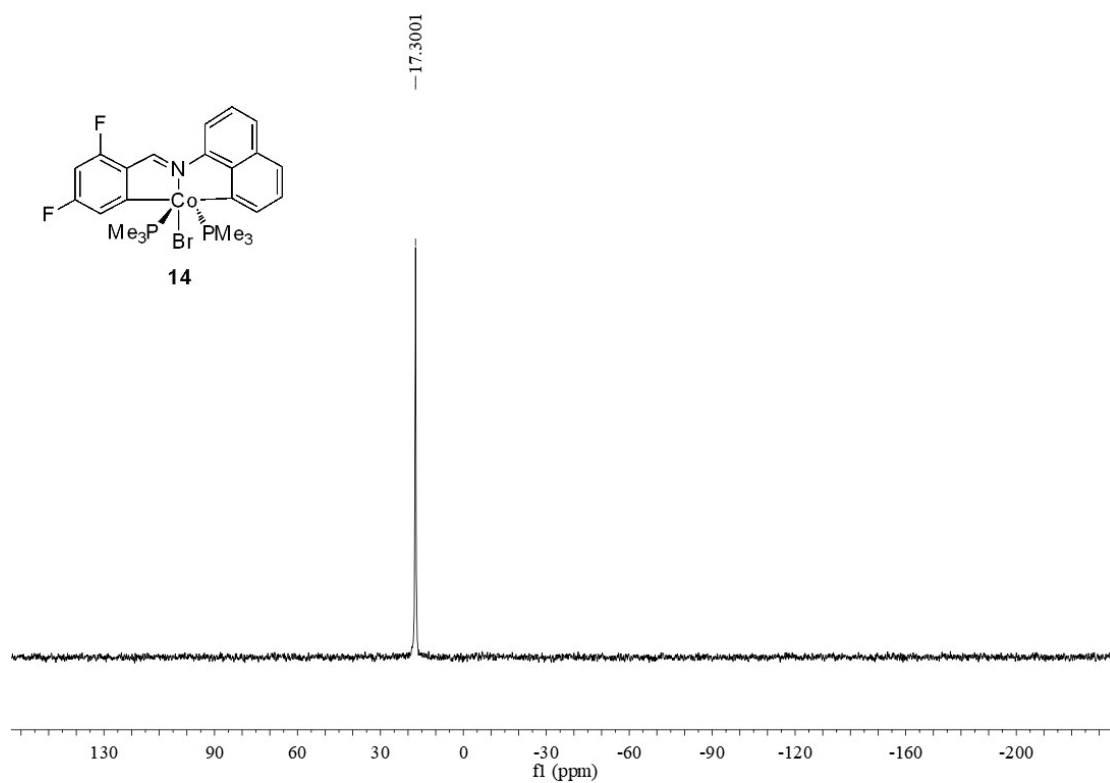

Fig S39  $^{31}\text{P}$  NMR spectrum of 14

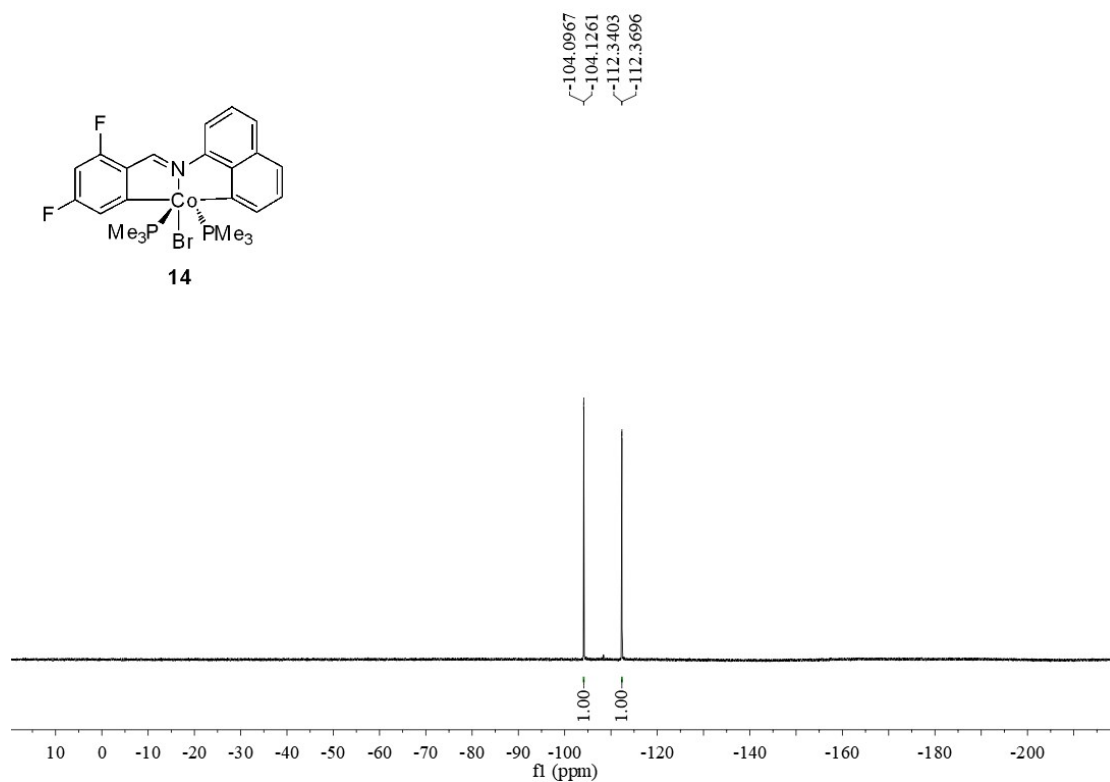

Fig S40  $^{19}\text{F}$  NMR spectrum of 14

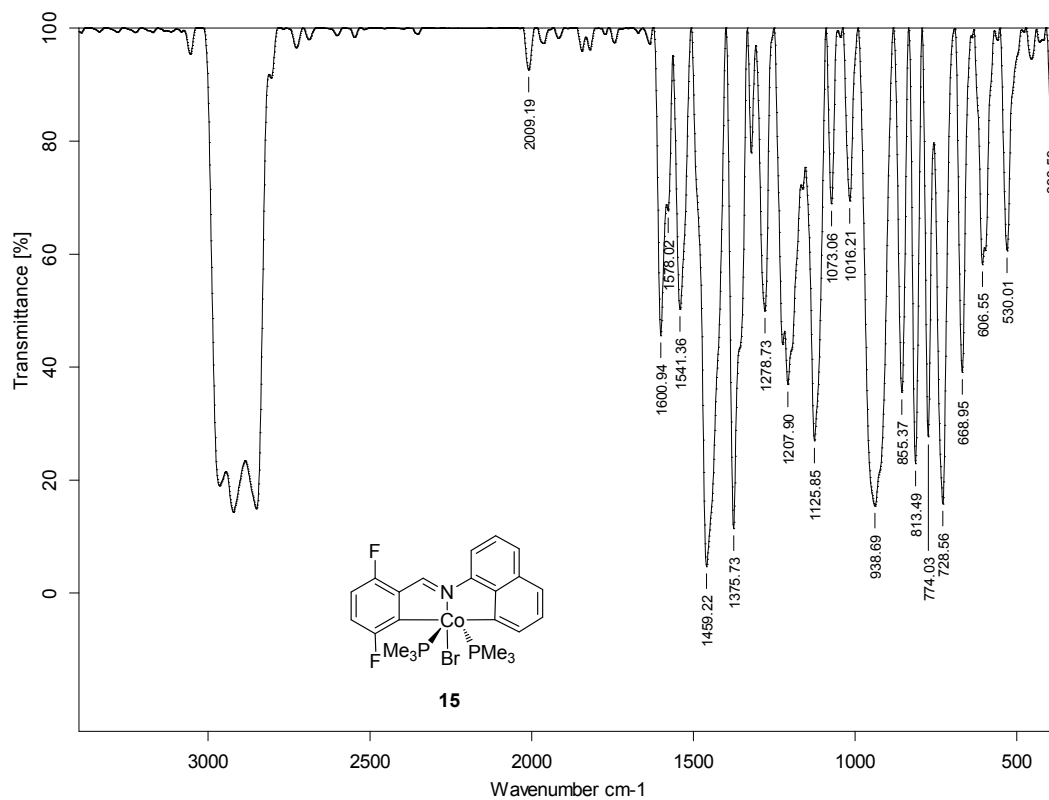

Fig S41 IR spectrum of **15**

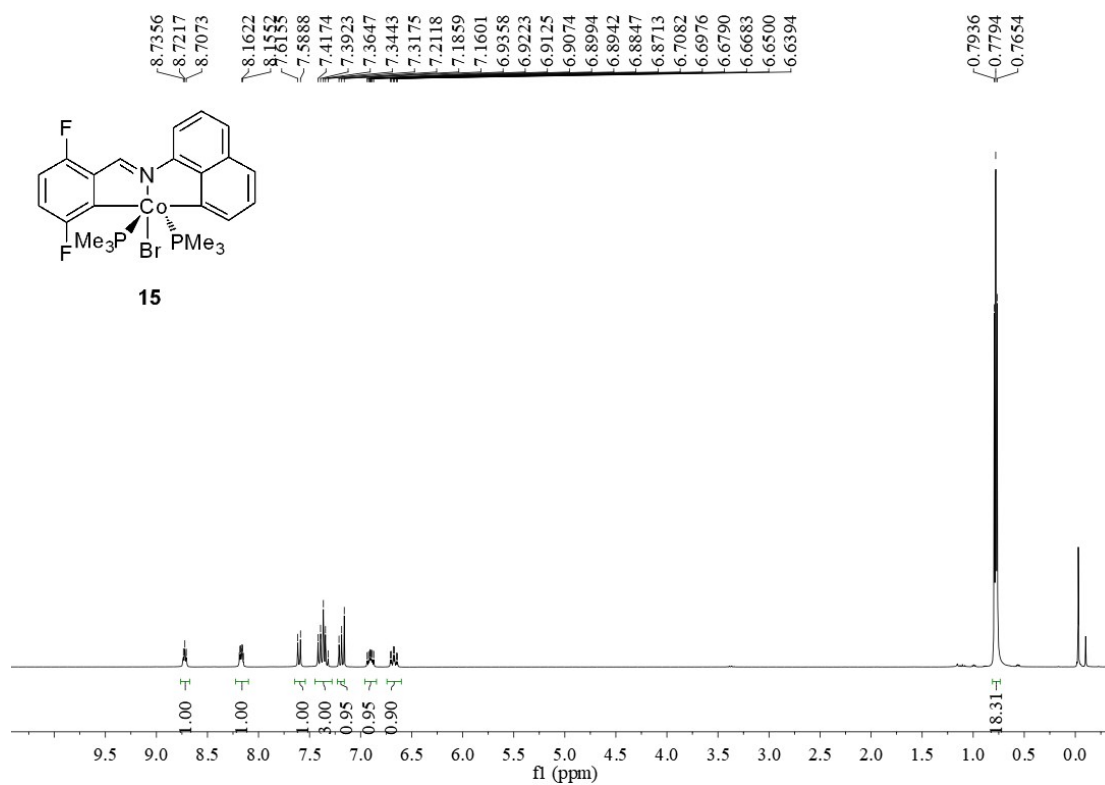

Fig S42  $^1\text{H}$  NMR spectrum of **15**

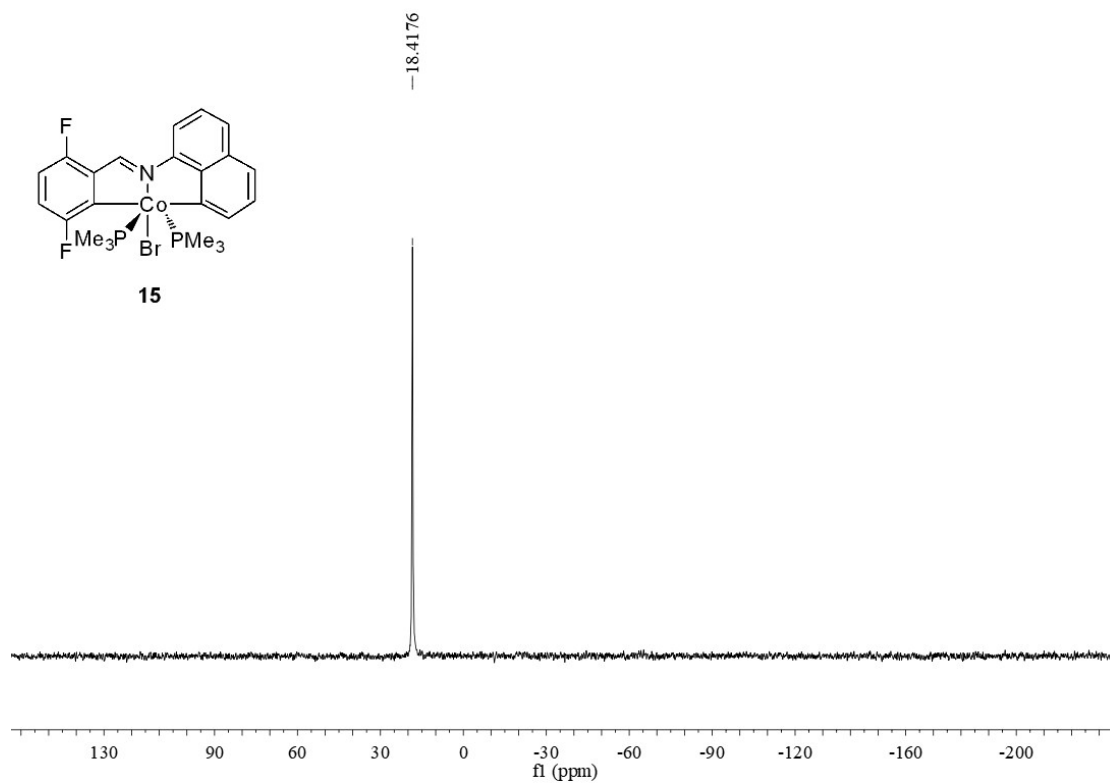

Fig S43 <sup>31</sup>P NMR spectrum of **15**

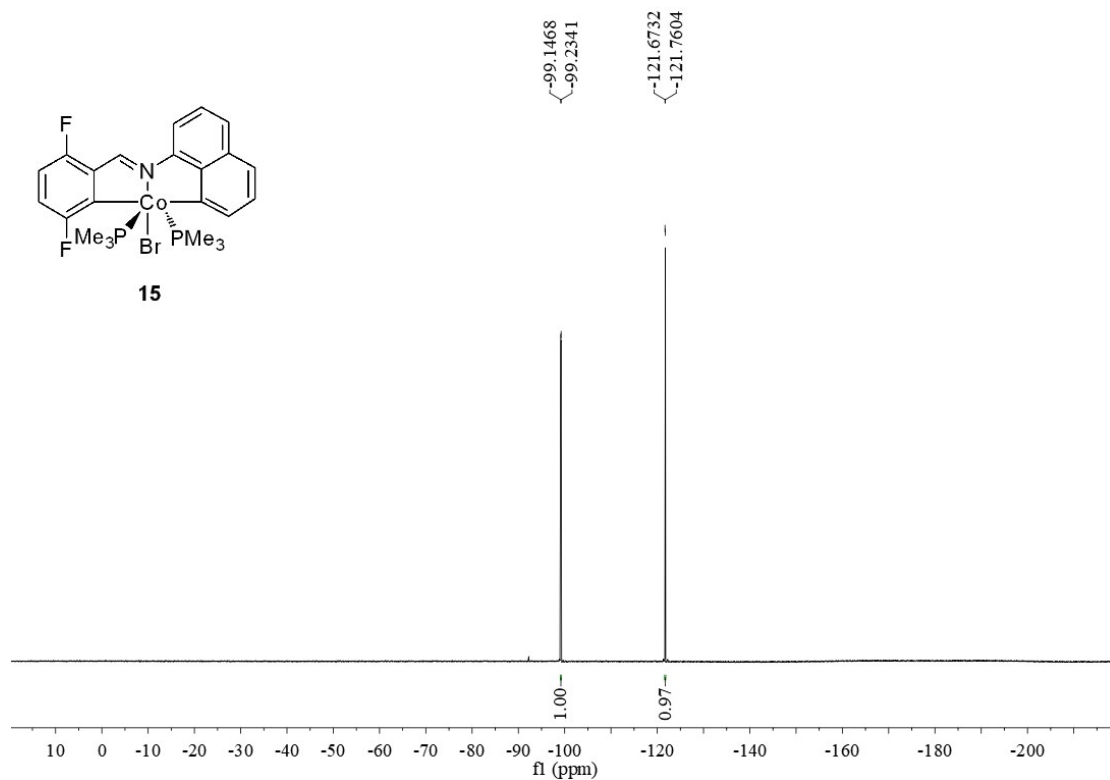

Fig S44 <sup>19</sup>F NMR spectrum of **15**



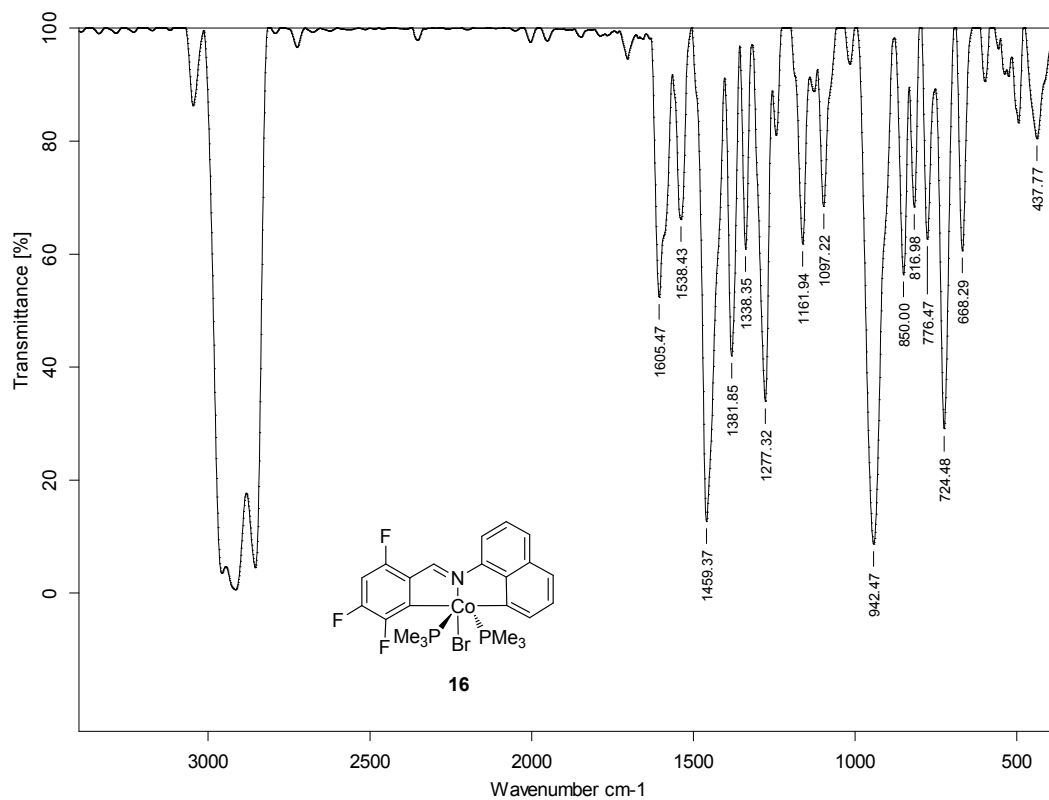

Fig S45 IR spectrum of **16**

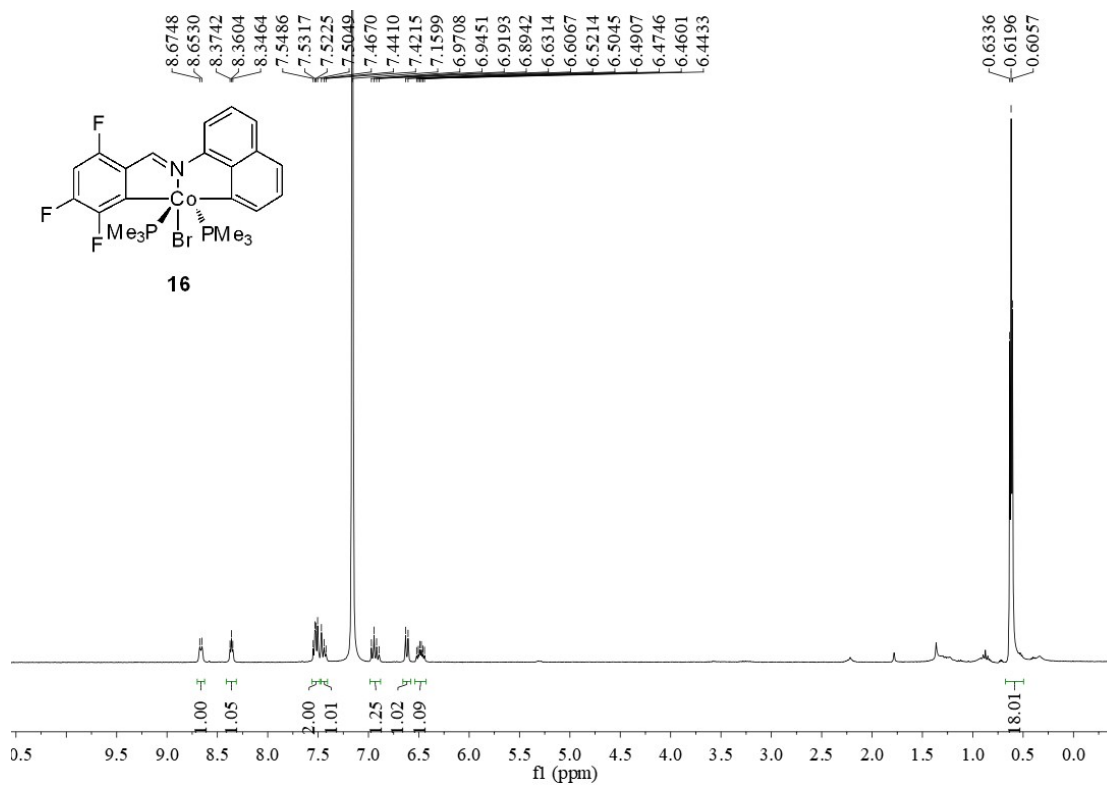

Fig S46 <sup>1</sup>H NMR spectrum of **16**

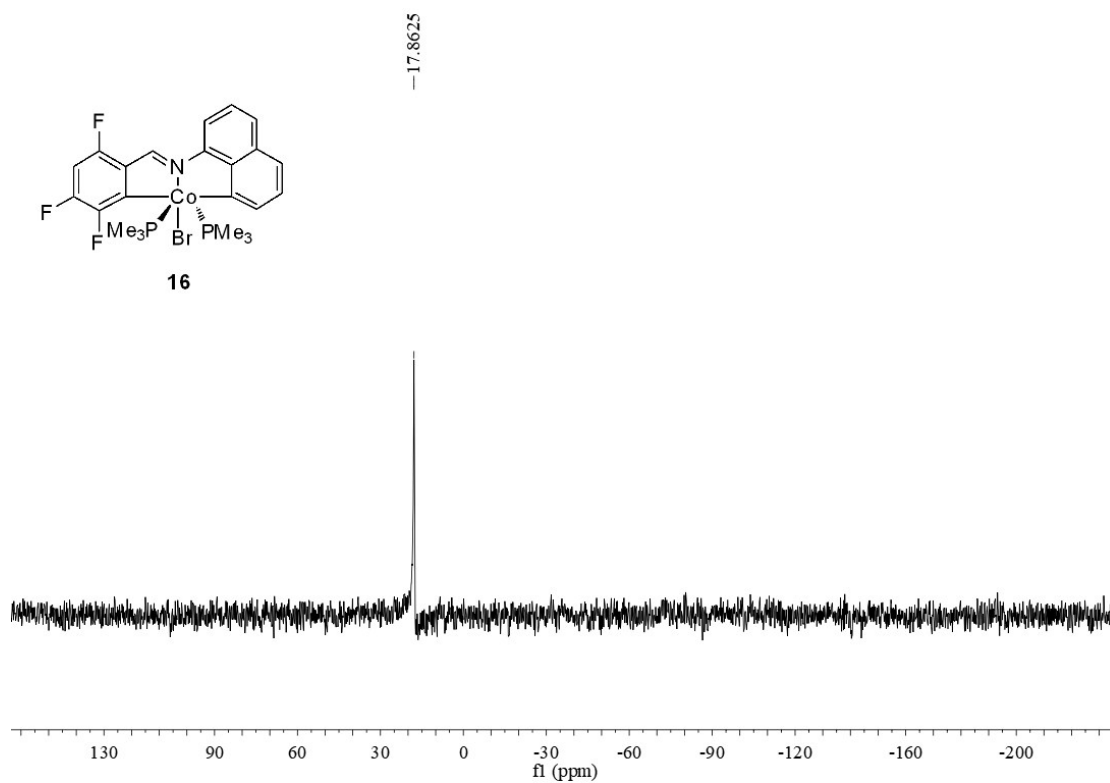

Fig S47  $^{31}\text{P}$  NMR spectrum of **16**

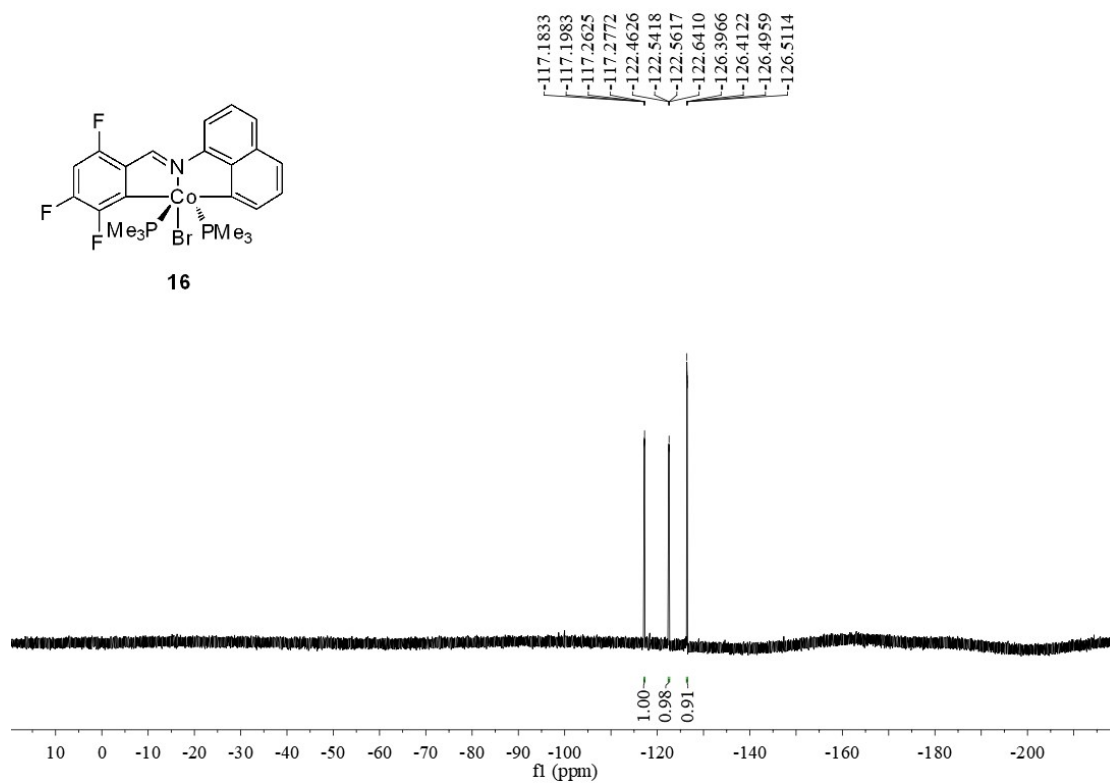

Fig S48  $^{19}\text{F}$  NMR spectrum of **16**

### 3 $^1\text{H}$ NMR spectra of alcohols

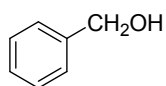

$^1\text{H}$  NMR (500 MHz,  $\text{CDCl}_3$ ,  $\delta$ ): 7.24–7.09 (m, *Ar*, 5H), 4.45 (s,  $\text{CH}_2$ , 2H), 2.90 (s,  $\text{OH}$ , 1H).

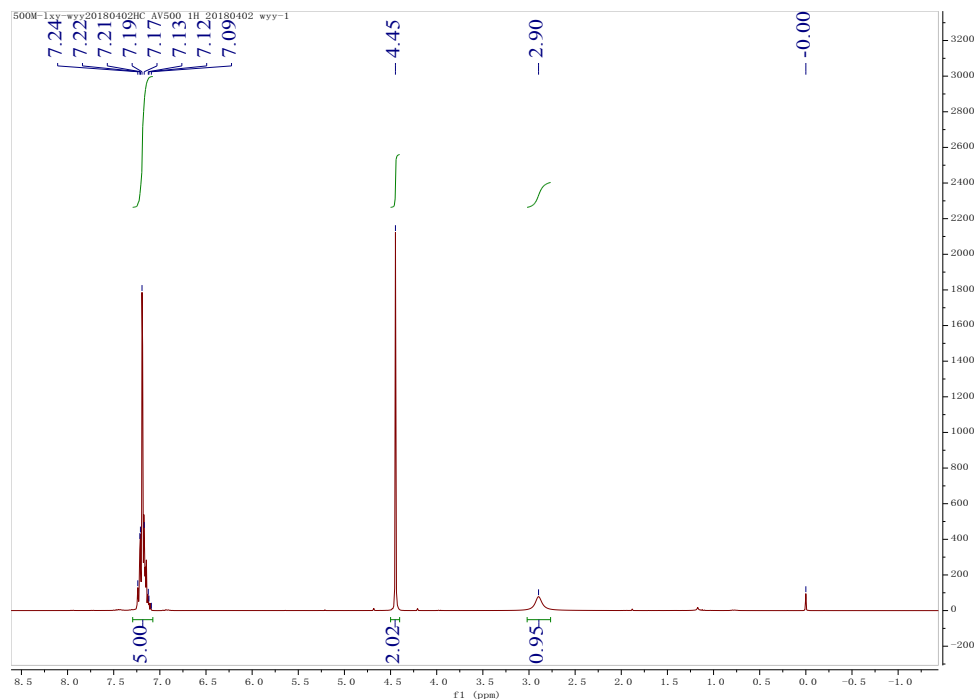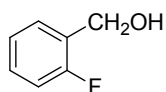

$^1\text{H}$  NMR (500 MHz,  $\text{CDCl}_3$ ,  $\delta$ ): 7.36–6.94 (m, *Ar*, 4H), 4.68 (s,  $\text{CH}_2$ , 2H), 1.88 (s,  $\text{OH}$ , 1H).

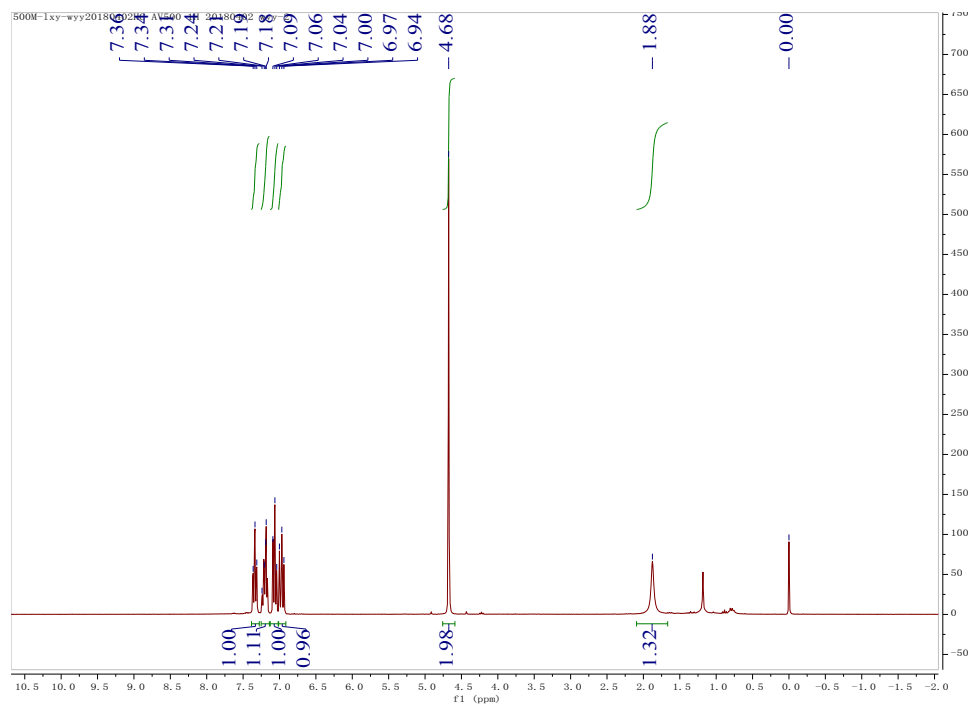

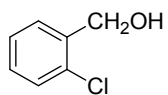

$^1\text{H NMR}$  (500 MHz,  $\text{CDCl}_3$ ,  $\delta$ ): 7.41–7.13 (m, Ar, 4H), 4.70 (s,  $\text{CH}_2$ , 2H), 2.01 (s, OH, 1H).

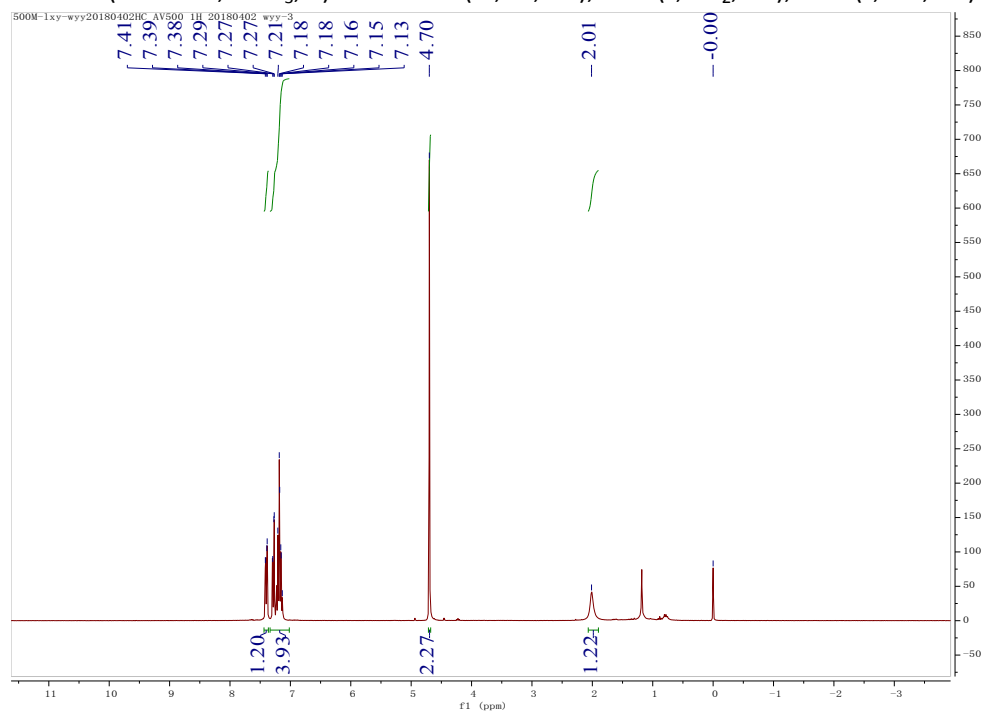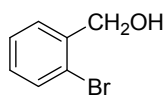

$^1\text{H NMR}$  (500 MHz,  $\text{CDCl}_3$ ,  $\delta$ ): 7.48–7.06 (m, Ar, 4H), 4.67 (s,  $\text{CH}_2$ , 2H), 2.04 (s, OH, 1H).

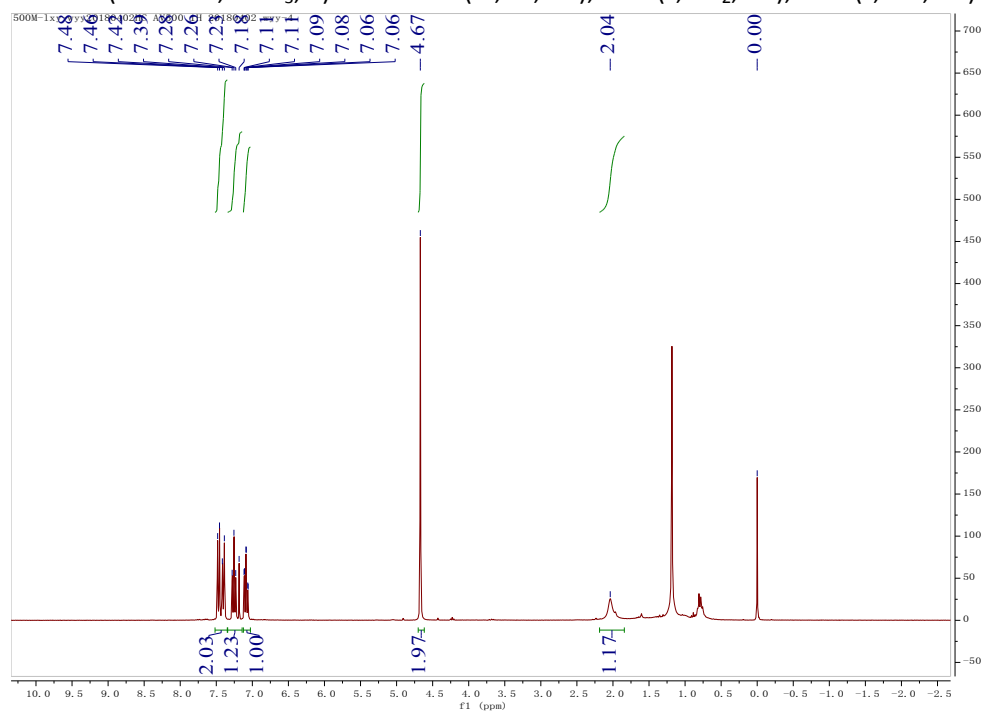

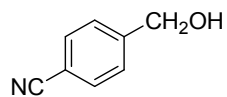

$^1\text{H NMR}$  (500 MHz,  $\text{CDCl}_3$ ,  $\delta$ ): 7.49–7.33 (m, Ar, 4H), 4.61 (q,  $\text{CH}_2$ , 2H), 3.49 (s, OH, 1H).

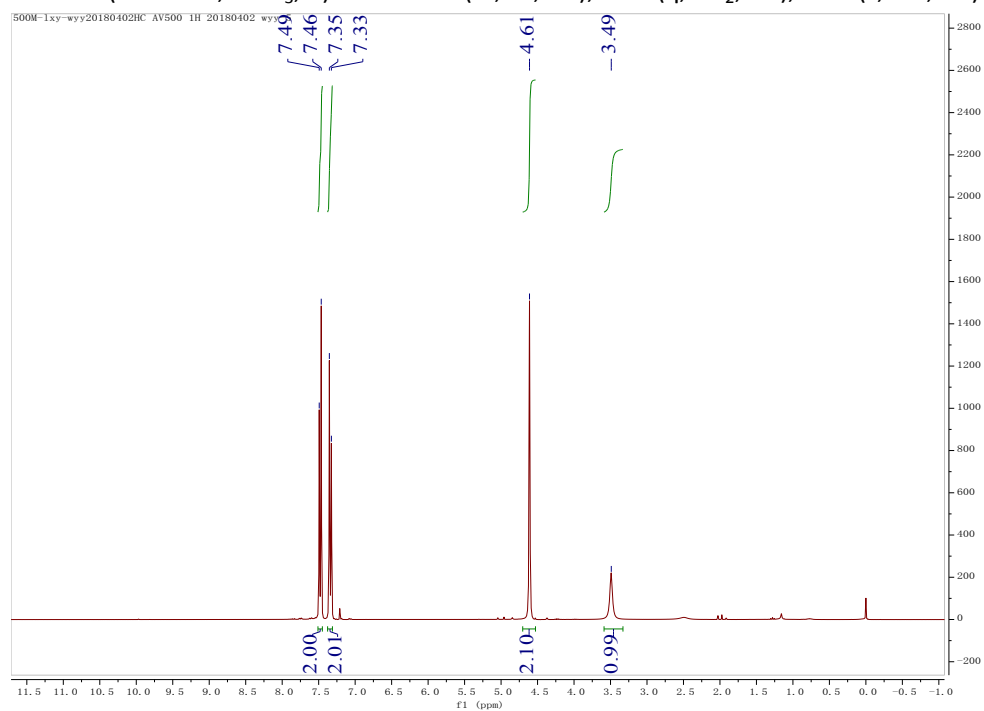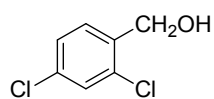

$^1\text{H NMR}$  (300 MHz,  $\text{CDCl}_3$ ,  $\delta$ ): 7.26–7.08 (m, Ar, 3H), 4.89 (d,  $\text{CH}_2$ , 2H), 2.11 (s, OH, 1H).

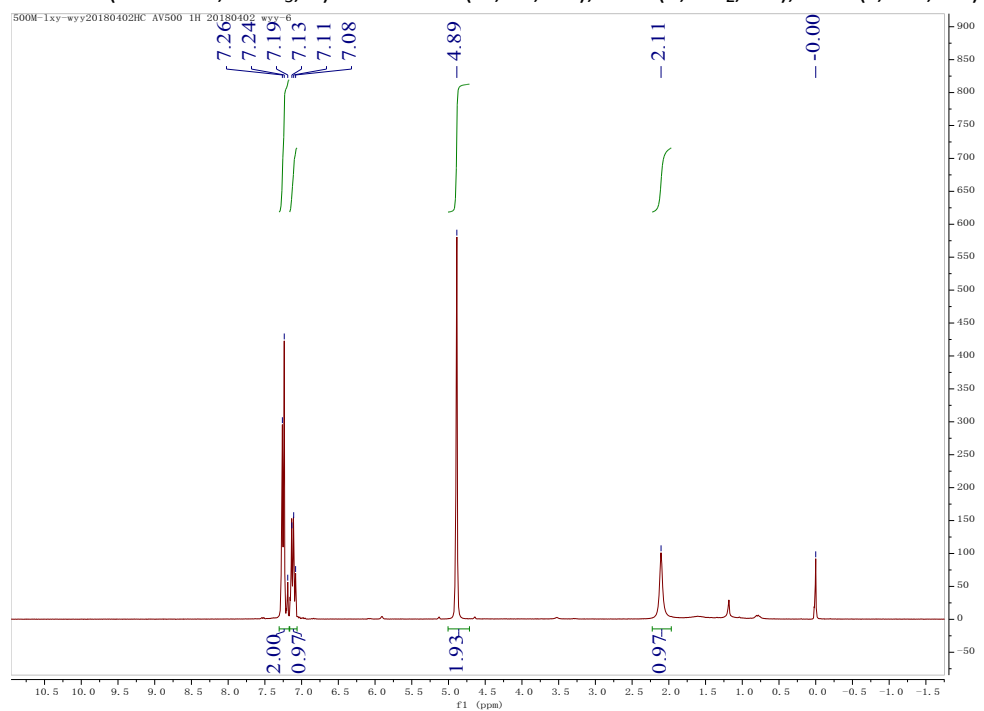

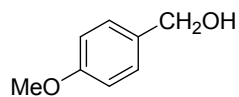

$^1\text{H}$  NMR (500 MHz,  $\text{CDCl}_3$ ,  $\delta$ ): 7.20–6.78 (m, Ar, 4H), 4.50 (s,  $\text{CH}_2$ , 2H), 3.72 (s,  $\text{OCH}_3$ , 3H), 1.91 (s, OH, 1H).

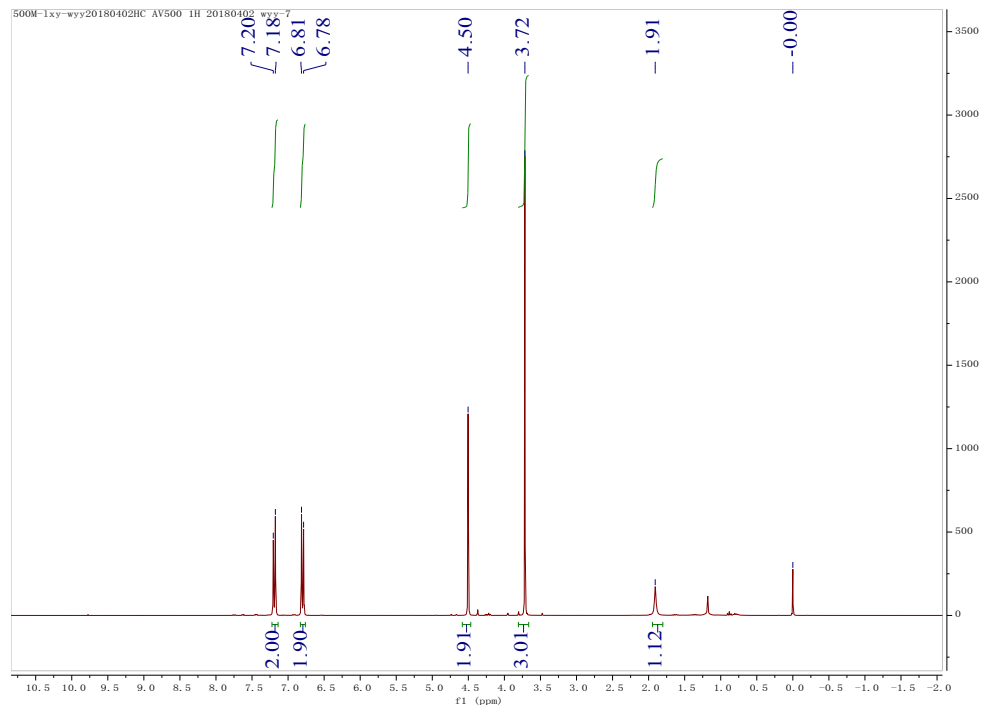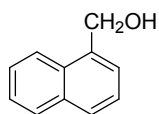

$^1\text{H}$  NMR (500 MHz,  $\text{CDCl}_3$ ,  $\delta$ ): 7.91–7.25 (m, Ar, 7H), 4.89 (s,  $\text{CH}_2$ , 2H), 2.34 (s, OH, 1H).

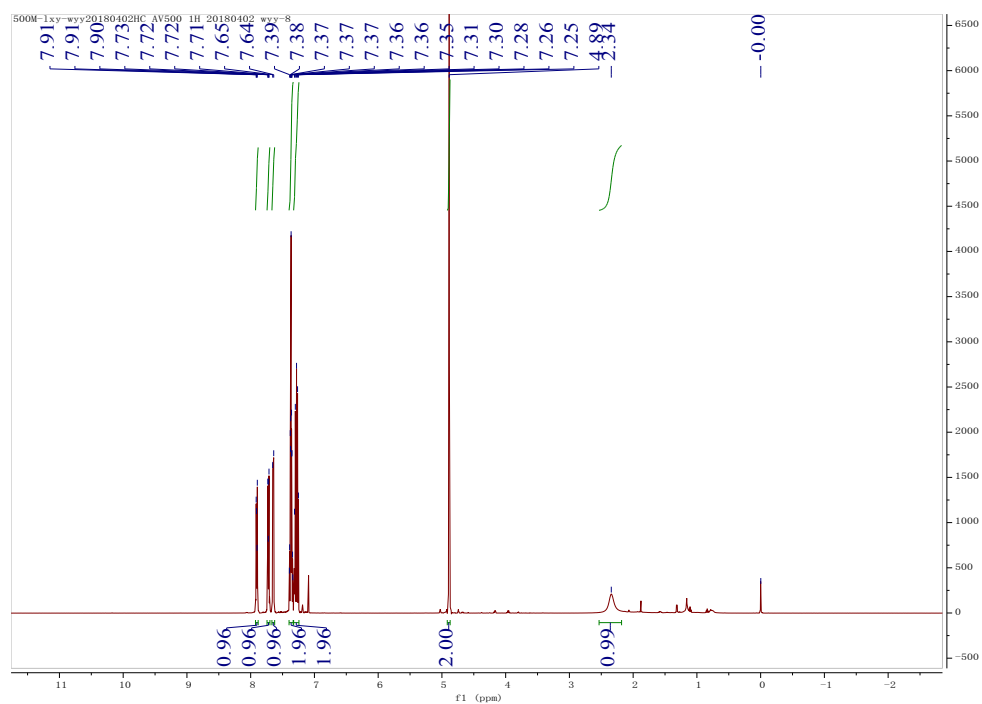

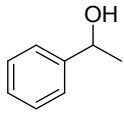

$^1\text{H NMR}$  (500 MHz,  $\text{CDCl}_3$ ,  $\delta$ ): 7.25–7.15 (m, Ar, 5H), 4.75 (q, CH, 1H), 2.16 (s, OH, 1H), 1.39 (d,  $\text{CH}_3$ , 3H).

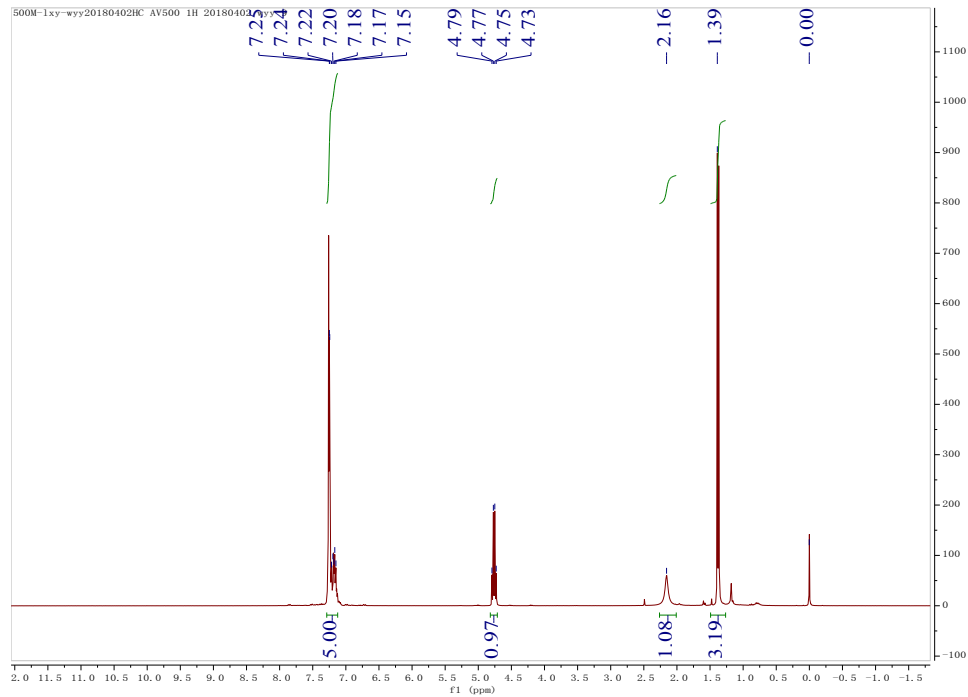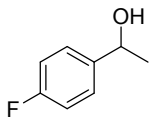

$^1\text{H NMR}$  (500 MHz,  $\text{CDCl}_3$ ,  $\delta$ ): 7.26–6.91 (m, Ar, 4H), 4.77 (q, CH, 1H), 2.02 (s, OH, 1H), 1.37 (d,  $\text{CH}_3$ , 3H).

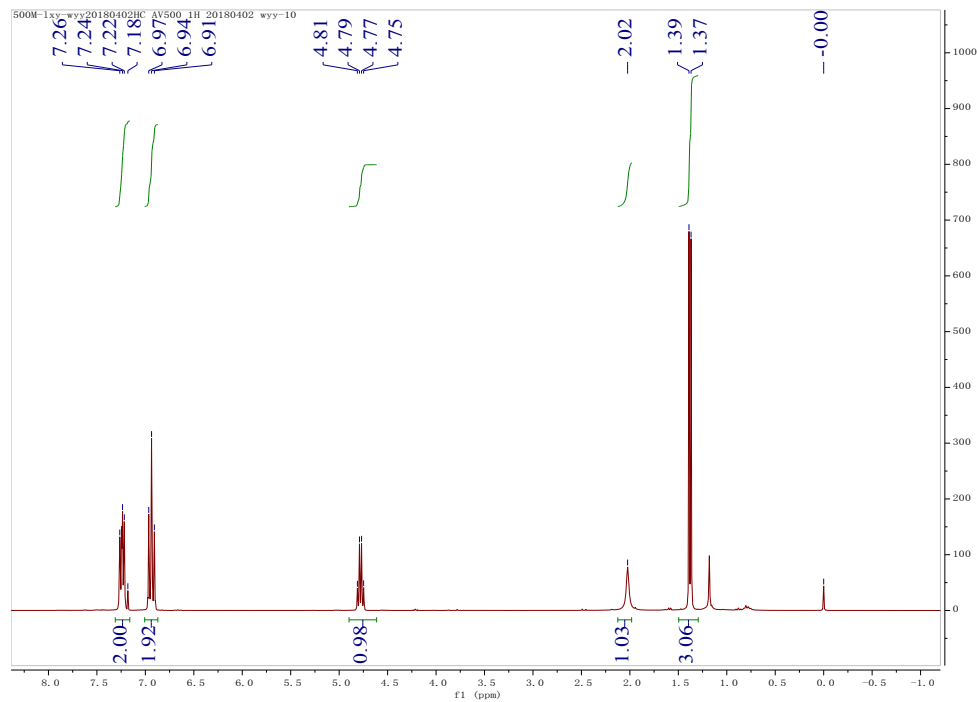

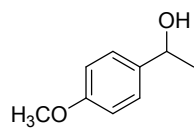

$^1\text{H NMR}$  (500 MHz,  $\text{CDCl}_3$ ,  $\delta$ ): 7.18–6.76 (m, Ar, 4H), 4.70 (q, CH, 1H), 3.68 (s,  $\text{OCH}_3$ , 3H), 2.26 (s, OH, 1H), 1.35 (d,  $\text{CH}_3$ , 3H).

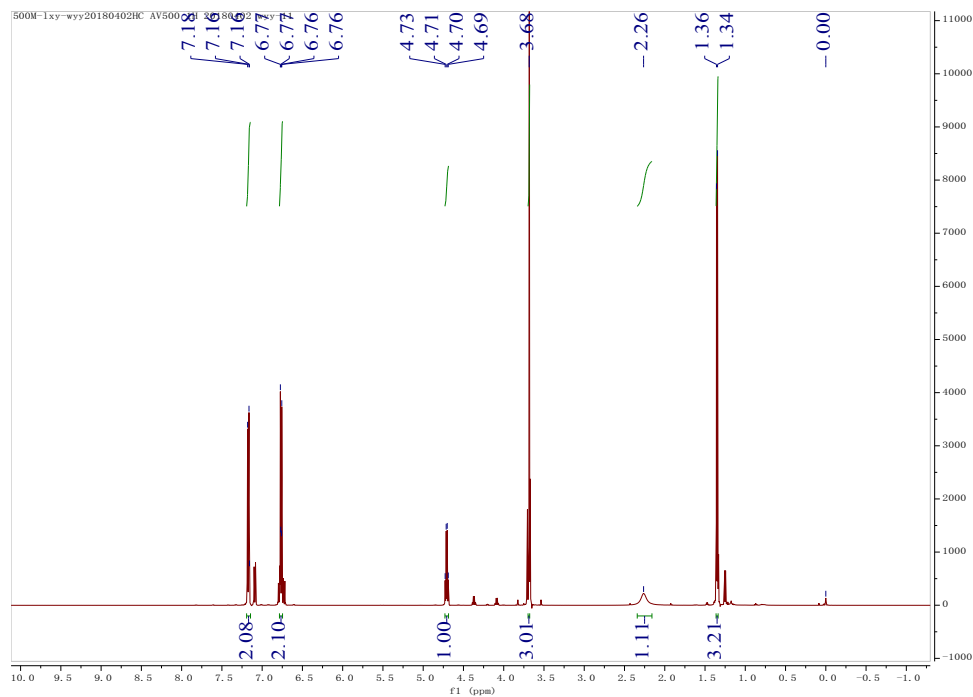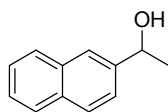

$^1\text{H NMR}$  (500 MHz,  $\text{CDCl}_3$ ,  $\delta$ ): 7.73–7.35 (m, Ar, 7H), 4.91 (q, CH, 1H), 2.06 (s, OH, 1H), 1.47 (d,  $\text{CH}_3$ , 3H).

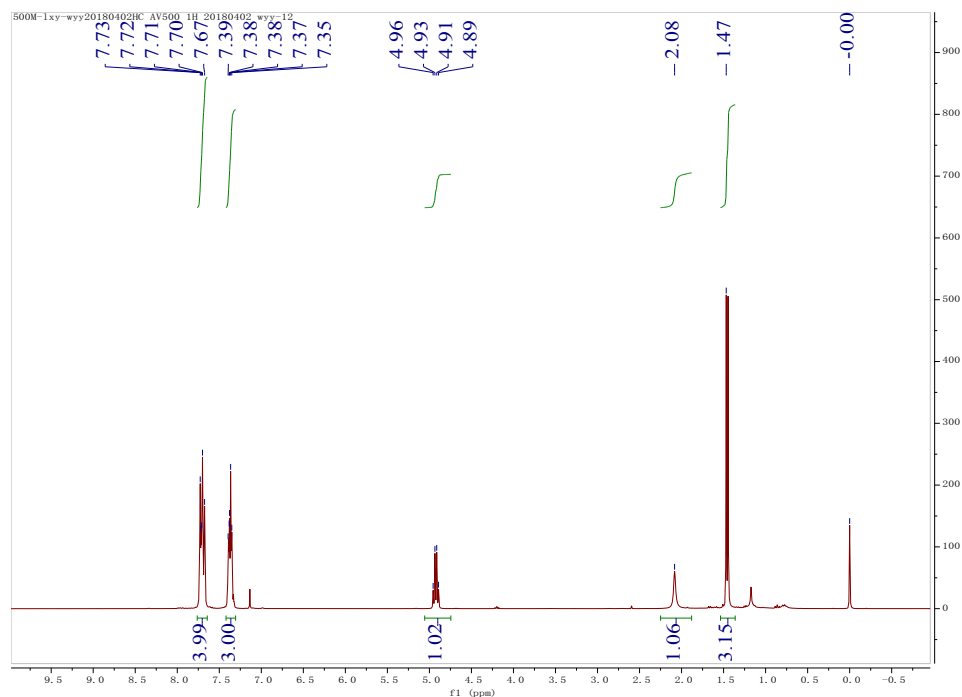



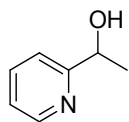

$^1\text{H NMR}$  (500 MHz,  $\text{CDCl}_3$ ,  $\delta$ ): 8.46–7.20 (m, Ar, 4H), 4.85–4.79 (q, CH, 1H), 3.83 (s, OH, 1H), 1.44–1.42 (d,  $\text{CH}_3$ , 3H).

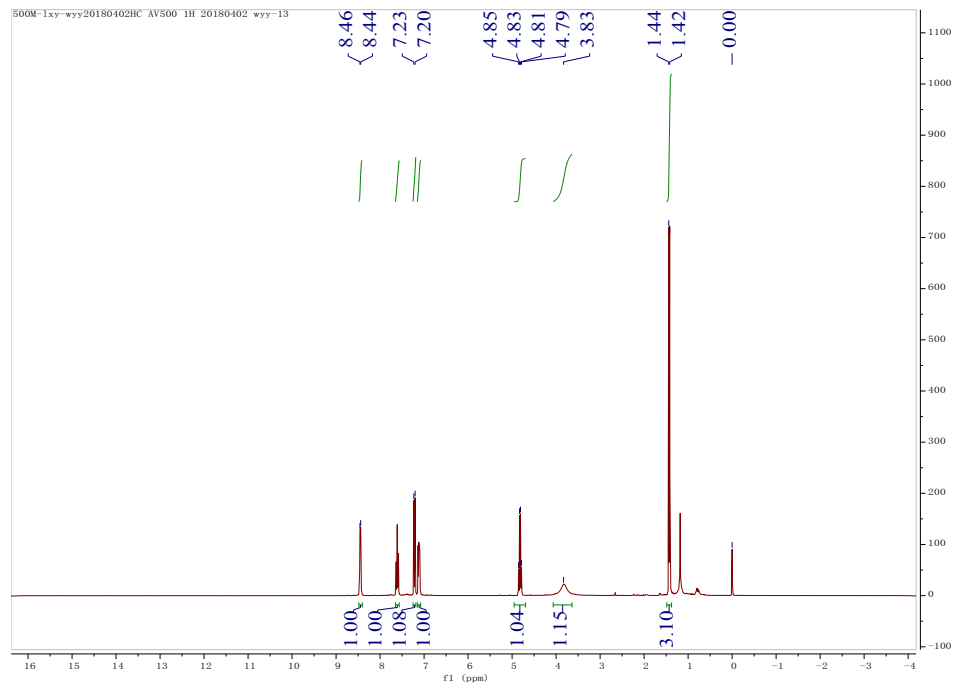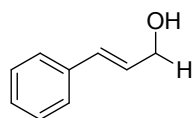

$^1\text{H NMR}$  (500 MHz,  $\text{CDCl}_3$ ,  $\delta$ ): 7.20–7.06 (m, Ar, 5H), 6.41 (d,  $\text{HC}=\text{C}$ , 1H), 6.16 (m,  $\text{C}=\text{CH}$ , 1H), 4.10 (dd,  $\text{CH}_2$ , 2H), 3.30 (s, OH, 1H).

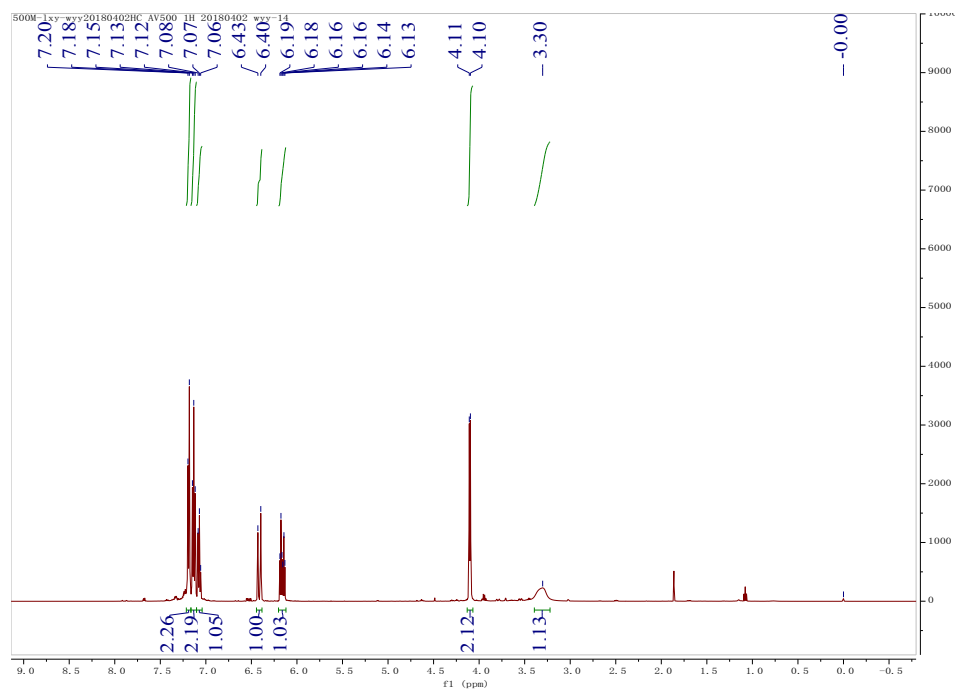

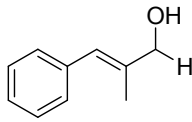

$^1\text{H NMR}$  (500 MHz,  $\text{CDCl}_3$ ,  $\delta$ ): 7.26-7.12 (m, Ar, 5H), 6.44 (d, HC=C, 1H), 4.09 (dd,  $\text{CH}_2$ , 2H), 1.90 (s, OH, 1H), 1.81 (s,  $\text{CH}_3$ , 3H).

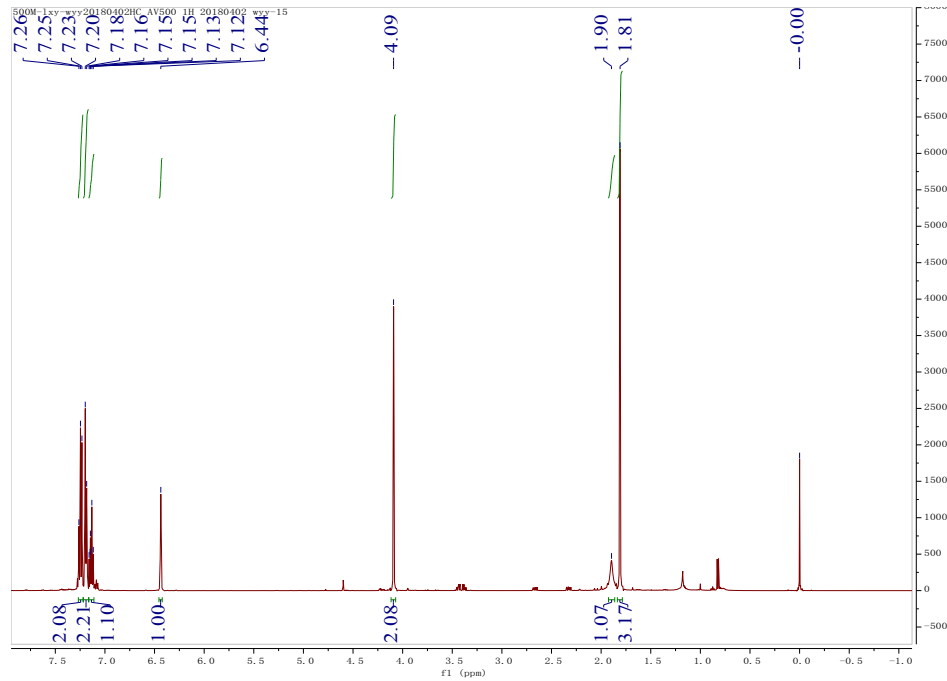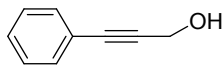

$^1\text{H NMR}$  (500 MHz,  $\text{CDCl}_3$ ,  $\delta$ ): 7.37-7.18 (m, Ar, 5H), 4.42 (s,  $\text{CH}_2$ , 2H), 1.81 (s, OH, 1H).

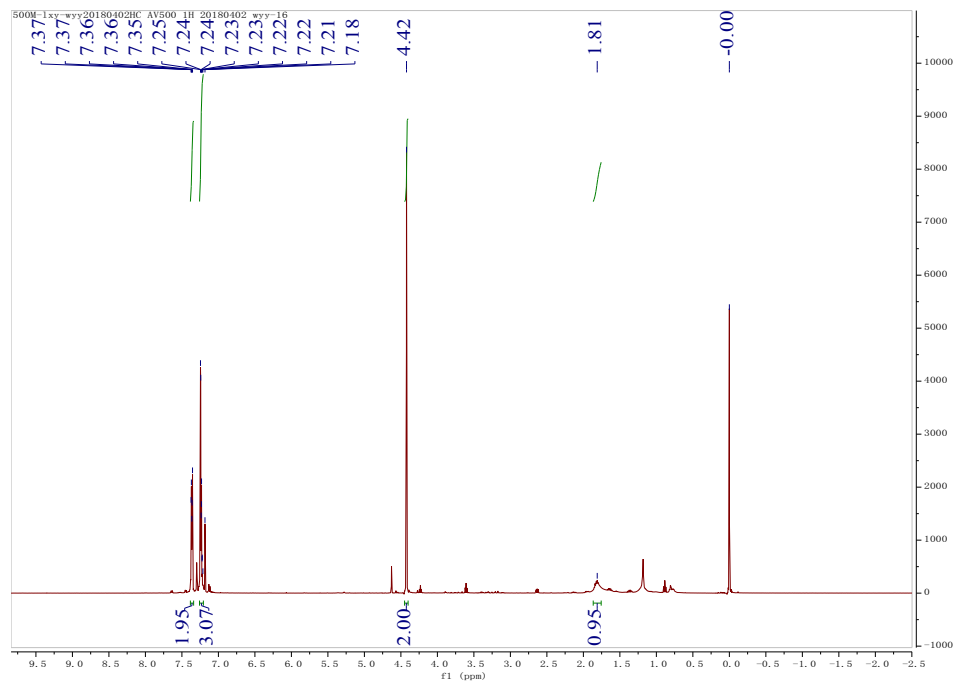

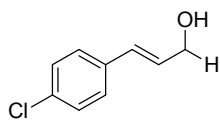

$^1\text{H NMR}$  (500 MHz,  $\text{CDCl}_3$ ,  $\delta$ ): 7.21-7.02 (m, Ar, 4H), 6.46 (d,  $\text{HC}=\text{C}$ , 1H), 6.24 (m,  $\text{C}=\text{CH}$ , 1H), 4.21 (dd,  $\text{CH}_2$ , 2H), 2.04 (s, OH, 1H).

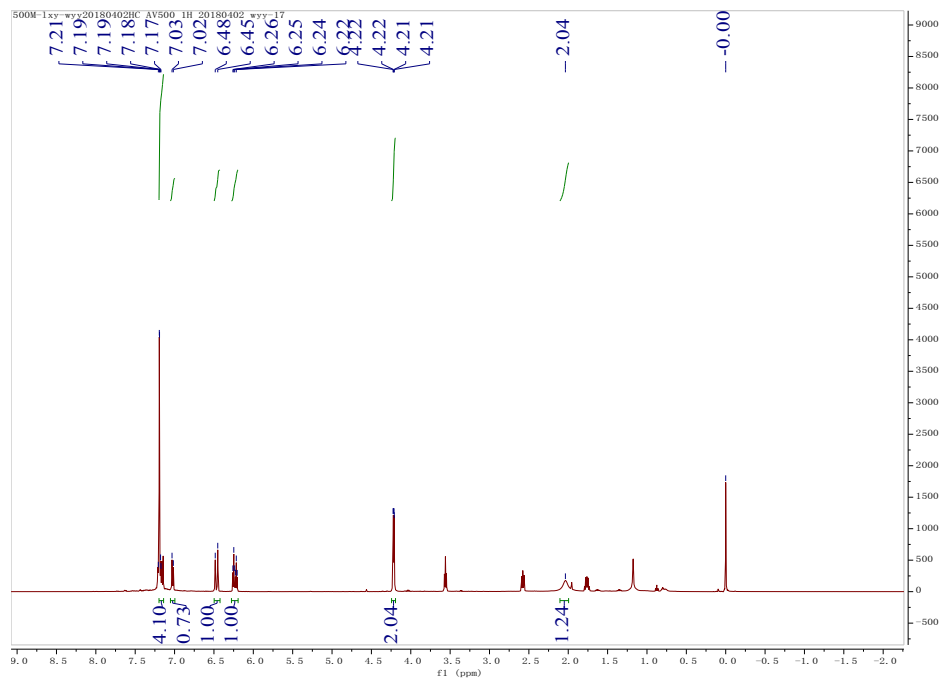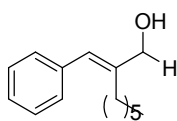

$^1\text{H NMR}$  (500 MHz,  $\text{CDCl}_3$ ,  $\delta$ ): 7.28-7.11 (m, Ar, 5H), 6.45 (s,  $\text{HC}=\text{C}$ , 1H), 4.15 (s,  $\text{CH}_2$ , 2H), 2.18 (m,  $\text{CH}_2$ , 2H), 1.63 (s, OH, 1H), 1.40-1.18 (m,  $\text{CH}_2$ , 8H), 0.79 (s,  $\text{CH}_3$ , 3H).

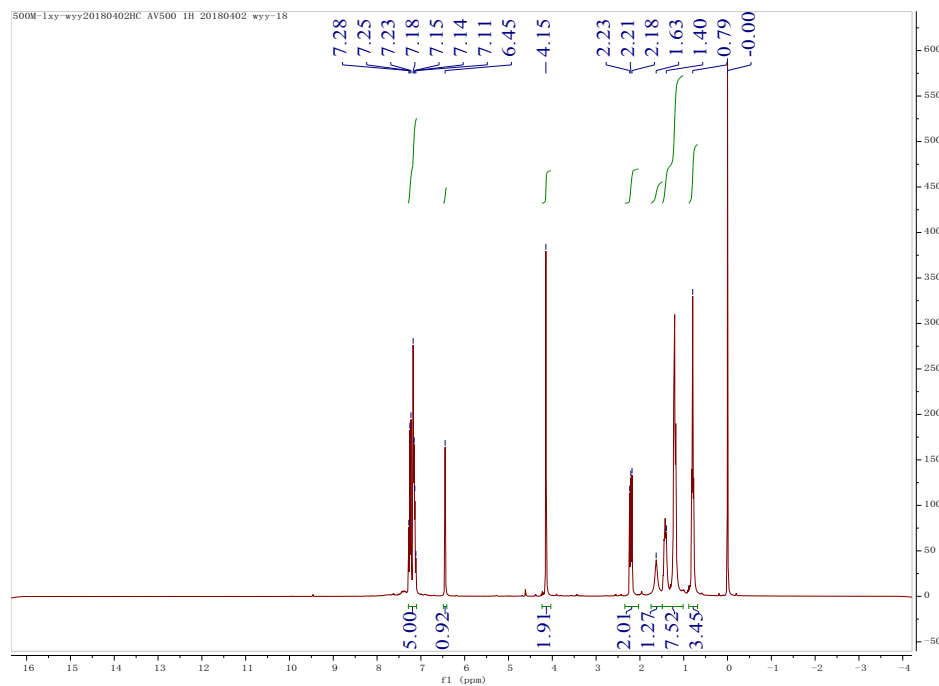

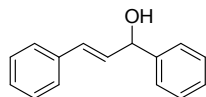

$^1\text{H}$  NMR (500 MHz,  $\text{CDCl}_3$ ,  $\delta$ ): 7.36-7.10 (m, Ar, 5H), 6.50 (dd, HC=C, 1H), 6.27 (td, C=CH, 1H), 5.02 (t, CH, 1H), 1.17 (s, OH, 1H).

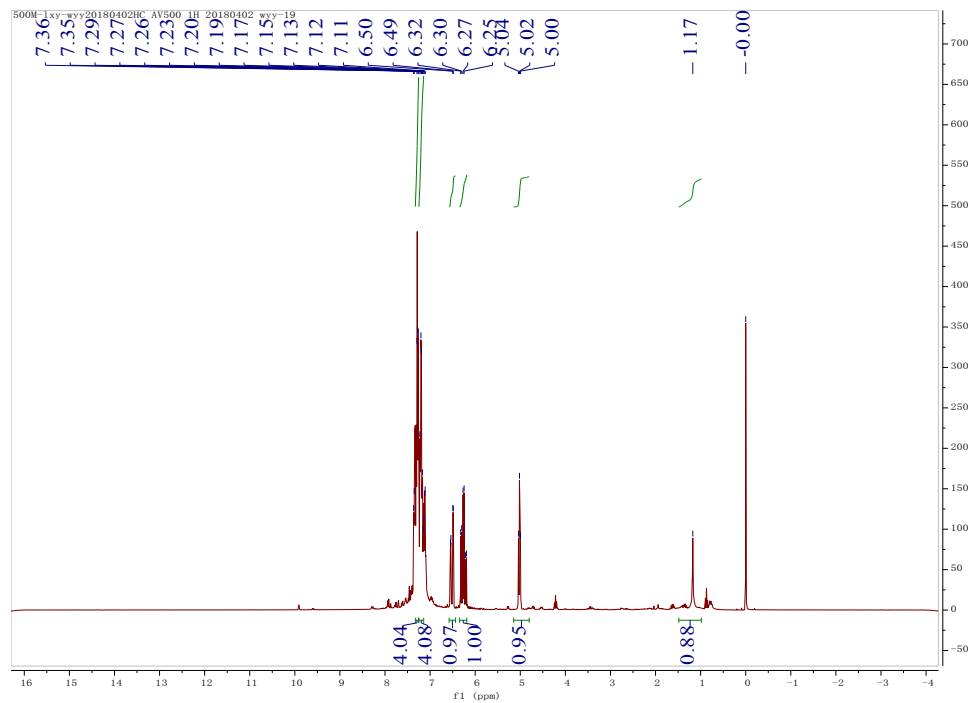

Supplement: c8nj02979b1.pdf [file c8nj02979b1.pdf]
